# Supplementary material for: Epi-mutations for spermatogenic defects by maternal exposure to di(2-ethylhexyl) phthalate
Source: eLife. 2021 Jul 28;10:e70322. doi: 10.7554/eLife.70322 (PMC8318585; doi:10.7554/eLife.70322)
Supplement: Figure 1—figure supplement 1—source data 1. [file elife-70322-fig1-figsupp1-data1.xlsx]

## Sheet: figure supplement 1C
Numerical source data for ratios of abnormal tubules				Kolmogorov-Smirnov test
generation	sample	abnormal tuule (%)		sample	p-value
F1	oil	10.6481		F1-Oil	0.683669
	oil	7.66703		F1-DEHP	0.529612
	oil	8.11744		F2-Oil	0.805685
	DEHP	16.5192		F2-DEHP	0.521052
	DEHP	19.8238
	DEHP	16.4859
F2	oil	15.2174
	oil	11.293
	oil	10.4274
	oil	14.4869
	DEHP	21.7753
	DEHP	21.0131
	DEHP	25.6983
	DEHP	22.0635

## Sheet: figure supplement 1D
Numerical source data for ratios of abnormal tubule types
generation	sample	Normal tubule(%)	Type-A (%)	Type-B (%)	Type-C (%)	total (%)
F1	oil	91.1891	4.9027	0.133498	3.77468	100
	DEHP	82.3904	11.0916	0.124891	6.39318	100
F2	oil	87.1438	6.36721	0	6.48895	100
	DEHP	77.3624	14.5159	0	8.12166	100

## Sheet: figure supplement 1F
Numerical data			Kolmogorov-Smirnov test
sample	multinucleated cell number/section		sample	p-value
oil	10		Oil	0.986095
oil	6		DEHP	0.66187
oil	3
DEHP	64
DEHP	49
DEHP	51
