# Supplementary material for: Epi-mutations for spermatogenic defects by maternal exposure to di(2-ethylhexyl) phthalate
Source: eLife. 2021 Jul 28;10:e70322. doi: 10.7554/eLife.70322 (PMC8318585; doi:10.7554/eLife.70322)
Supplement: Figure 1—source data 1. [file elife-70322-fig1-data1.xlsx]

## Sheet: Figure 1C
Numerical source data for ratios of abnormal tubules				Kolmogorov-Smirnov test
generation	sample	abnormal tubule (%)		sample	p-value
F1	oil	3.91909		F1-Oil	0.791192
	oil	2.55661		F1-DEHP	0.886219
	oil	2.51572		F2-Oil	0.347466
	oil	6.39269		F2-DEHP	0.957745
	DEHP	20.6603
	DEHP	24.0385
	DEHP	18.8034
	DEHP	27.9612
	DEHP	28.9803
F2	oil	7.61035
	oil	8.75576
	oil	14.4958
	oil	8.59729
	oil	9.50156
	oil	8.81459
	DEHP	27.49
	DEHP	22.6381
	DEHP	14.7799
	DEHP	27.4621
	DEHP	15.3351
	DEHP	20.205
	DEHP	24.0429
	DEHP	20.5128

## Sheet: Figure 1D
Numerical source data for ratios of abnormal tubule types
generation	sample	Normal tubule (%)	Type-A (%)	Type-B (%)	Type-C (%)	total (%)
F1	Oil	96.154	2.9428	0	0.903234	100
	DEHP	75.9113	17.9617	2.77729	3.34977	100
F2	Oil	90.3708	7.51904	0	2.11019	100
	DEHP	78.4418	12.8617	0	8.69655	100
