# Supplementary material for: Epi-mutations for spermatogenic defects by maternal exposure to di(2-ethylhexyl) phthalate
Source: eLife. 2021 Jul 28;10:e70322. doi: 10.7554/eLife.70322 (PMC8318585; doi:10.7554/eLife.70322)
Supplement: Figure 2—source data 1. — SPG: spermatogonia; SPC: spermatocytes; RS: round spermatids. [file elife-70322-fig2-data1.xlsx]

## Sheet: Figure 2D
Numerical data for relative gene expression levels (unsort as 1)						Kolmogorov-Smirnov test p-value
Gfra1	unsort	SPG	SPC	RS		sample	p-value
	1	2.47944	2.51467	0.0104001		Gfar1-unsort	0.621019
	1	0.582103	3.16135	0.0371535		Gfar1-SPG	0.325639
	1	0.687853	1.32581	0.0167119		Gfra1-SPC	0.984364
	1	11.5036	4.94997	0.018582		Gfra1-RS	0.246368
	1	14.4143	3.70981	0.0366706		Scp3-unsort	0.621019
	1	2.55111	2.55111	0.142063		Scp3-SPG	0.621019
						Scp3-SPC	0.91602
Scp3	unsort	SPG	SPC	RS		Scp3-RS	0.912053
	1	0.639761	4.61389	0.0759265		Acrv1-unsort	0.621019
	1	1.21516	7.56939	0.142352		Acrv1-SPG	0.323819
	1	0.538711	3.46544	0.120863		Acrv1-SPC	0.927301
	1	0.816063	5.704	0.185576		Acrv1-RS	0.570759
	1	0.501459	6.16036	0.200776
	1	0.571066	3.47544	0.0702578
Acrv1	unsort	SPG	SPC	RS
	1	0.0154162	0.0150465	6.48857
	1	0.0106387	0.0118858	3.60699
	1	0.0409381	0.0206064	2.26681
	1	0.0162358	0.0146282	1.79785
	1	0.0102567	0.00952772	2.26952
SPG: Spermatogonia
SPC: Spermatocyte
RS: Round spermatid
