# Supplementary material for: Epi-mutations for spermatogenic defects by maternal exposure to di(2-ethylhexyl) phthalate
Source: eLife. 2021 Jul 28;10:e70322. doi: 10.7554/eLife.70322 (PMC8318585; doi:10.7554/eLife.70322)
Supplement: Figure 4—figure supplement 2—source data 1. [file elife-70322-fig4-figsupp2-data1.xlsx]

## Sheet: Figure 4-figure suplement 2A
Numerical source data for relative gene expression (an Oil-treated sammple as 1)					Kolmogorov-Smirnov test
	sample	relative expression level			sample	p-value
Sycp1	Oil	1			Hist1h2ba-Oil	0.562523
	Oil	1.35302			Hist1h2ba-DEHP	0.826939
	Oil	0.890257			Sycp1-Oil	0.931101
	Oil	1.22775			Sycp1-DEHP	0.842875
	DEHP	1.11278			Taf7l-Oil	0.47906
	DEHP	1.43136			Taf7l-DEHP	0.82476
	DEHP	0.939303
	DEHP	1.14618
Hist1h2ba	Oil	1
	Oil	0.506673
	Oil	0.378462
	Oil	0.425009
	DEHP	0.602216
	DEHP	0.439335
	DEHP	0.540142
	DEHP	0.560204
Taf7l	Oil	1
	Oil	0.890601
	Oil	0.871358
	Oil	0.897223
	DEHP	1.24328
	DEHP	0.935753
	DEHP	1.02224
	DEHP	1.30125

## Sheet: Figure 4-figure suplement 2C
Numerical data for methylation status (%) in each clone
methylation status (%) of each clone for Hist1h2ba-1			methylation status (%) of each clone for Hist1h2ba-2			methylation status (%) of each clone for Sycp1			methylation status (%) of each clone for Taf7l
oil	DEHP		oil	DEHP		oil	DEHP		oil	DEHP
0	0		0	0		0	0		0	0
0	0		0	0		0	0		0	0
0	0		0	0		0	0		0	0
0	0		0	0		0	0		0	0
0	0		0	0		0	0		0	0
0	0		0	0		0	0		0	0
0	0		0	0		0	0		0	0
0	0		0	0		0	0		0	0
0	0		0	0		0	0		0	0
0	0		0	0		0	0		0	0
0	0		0	0		0	0		0	0
0	0		0	0		0	0		0	0
0	0		0	0		0	0		0	0
0	0		0	0		0	0		0	0
0	0		0	0		0	0		0	0
0	0		0	0		0	0		0	0
0	0		0	0		0	0		0	0
0	0		0	0		0	0		0	0
0	0		0	0		0	0		0	0
0	0		0	0		0	0		0	0
0	0		0	0		0	0		12.5	0
0	0		0	0		0	0		12.5	0
0	0		0	0		0	0		12.5	12.5
0	0		0	0		0	0		12.5	12.5
9.1	0		0	4.3		4.3	0		12.5	62.5
9.1	0		0	4.3		4.3	0		12.5	87.5
9.1	0		4.3	4.3		4.3	0		12.5	100
9.1	0		4.3	4.3		4.3	0		37.5	100
9.1	0		4.3	4.3		4.3	4.3		37.5
9.1	0		4.3	4.3		4.3	4.3		62.5
	0		4.3	4.3		4.3	4.3		87.5
	0		4.3	8.7		4.3	8.7		87.5
	0		82.6	8.7		4.3	8.7		100
	0		91.3	8.7		4.3	13		100
	9.1		91.3	91.3		8.7	17.4
	9.1			100		8.7	17.4
				100		8.7	21.7
				100		8.7	82.6
						13	87
							95.7

## Sheet: Figure 4-figure suplement 2D
Numerical source data for relative gene expression (Unsort as 1)						Kolmogorov-Smirnov test
generation	sample	Unsort	SPG			sample	p-value
F1	Oil	1	38.4795			F1-Oil	0.941574
	Oil	1	19.4126			F1-DEHP	0.998636
	Oil	1	9.66121			F2-Oil	0.718176
	Oil	1	49.6892			F2-DEHP	0.588322
	DEHP	1	40.8188
	DEHP	1	17.8534
	DEHP	1	31.6908
	DEHP	1	53.3443
F2	Oil	1	3.60757
	Oil	1	16.5218
	Oil	1	14.2207
	DEHP	1	3.90131
	DEHP	1	18.5664
	DEHP	1	19.6466
SPG: Spermatogonia
