# Supplementary material for: Epi-mutations for spermatogenic defects by maternal exposure to di(2-ethylhexyl) phthalate
Source: eLife. 2021 Jul 28;10:e70322. doi: 10.7554/eLife.70322 (PMC8318585; doi:10.7554/eLife.70322)
Supplement: Figure 4—source data 1. [file elife-70322-fig4-data1.xlsx]

## Sheet: Figure 4A
Numerical source data for gene expression levels (an Oil-treated sample as 1)					Kolmogorov-Smirnov test p-value
	sample	relative expression level			sample	p-value
Sycp1	Oil	1			Asz1-Oil	0.783551
	Oil	1.38428			Asz1-DEHP	0.407217
	Oil	1.19407			Ddx4-Oil	0.964285
	Oil	0.651677			Ddx4-DEHP	0.914784
	Oil	0.881259			Hist1h2aa-Oil	0.842484
	Oil	0.548384			Hist1h2aa-DEHP	0.69545
	DEHP	0.656283			Hist1h2ba-Oil	0.983
	DEHP	0.582394			Hist1h2ba-DEHP	0.653186
	DEHP	0.40997			Sycp1-Oil	0.974591
	DEHP	0.428612			Sycp1-DEHP	0.786532
	DEHP	0.632771			Taf7l-Oil	0.974591
	DEHP	0.339971			Taf7l-DEHP	0.786532
					Tbata-Oil	0.818233
Hist1h2ba	Oil	1			Tbata-DEHP	0.913393
	Oil	1.99047			Tdrd1-Oil	0.562988
	Oil	1.45093			Tdrd1-DEHP	0.919727
	Oil	0.490289			Tex13-Oil	0.663498
	Oil	0.758046			Tex13-DEHP	0.950906
	Oil	0.324374
	DEHP	0.270997
	DEHP	0.386879
	DEHP	0.139404
	DEHP	0.186772
	DEHP	0.169938
	DEHP	0.119515
Hist1h2aa	Oil	1
	Oil	2.05326
	Oil	1.70059
	Oil	0.594781
	Oil	0.845698
	Oil	0.381073
	DEHP	1.2248
	DEHP	1.20747
	DEHP	0.468042
	DEHP	0.651825
	DEHP	0.538783
	DEHP	0.353561
Taf7l	Oil	1
	Oil	1.08244
	Oil	1.26409
	Oil	0.984982
	Oil	0.979987
	Oil	0.638433
	DEHP	0.639112
	DEHP	0.648747
	DEHP	0.256477
	DEHP	0.472524
	DEHP	0.738531
	DEHP	0.510235
Tex13	Oil	1
	Oil	1.25753
	Oil	1.21899
	Oil	1.05485
	Oil	1.10958
	Oil	0.560831
	DEHP	1.2818
	DEHP	1.31978
	DEHP	1.1872
	DEHP	0.921601
	DEHP	1.4545
	DEHP	0.995921
Tbata	Oil	1
	Oil	1.06211
	Oil	1.13564
	Oil	0.3105
	Oil	0.82843
	Oil	1.82533
	DEHP	1.21746
	DEHP	1.45793
	DEHP	1.03641
	DEHP	1.24752
	DEHP	1.89238
	DEHP	0.839537
Asz1	Oil	1
	Oil	1.19418
	Oil	1.06738
	Oil	0.825193
	Oil	1.01025
	Oil	0.713887
	DEHP	0.836184
	DEHP	0.80932
	DEHP	0.765272
	DEHP	0.715875
	DEHP	1.16334
	DEHP	0.737576
Ddx4	Oil	1
	Oil	1.25057
	Oil	0.646035
	Oil	0.948137
	Oil	0.925601
	Oil	0.802085
	DEHP	1.20118
	DEHP	1.15695
	DEHP	0.957244
	DEHP	0.987694
	DEHP	1.4184
	DEHP	0.830871
Tdrd1	Oil	1
	Oil	0
	Oil	0.705127
	Oil	0.657702
	Oil	0.708454
	Oil	0.521003
	DEHP	0.64294
	DEHP	0.729867
	DEHP	0.772773
	DEHP	0.433324
	DEHP	0

## Sheet: Figure 4C
Numerical data for methylation status (%) in each clone
methylation status (%) of each clone for Hist1h2ba-1			methylation status (%) of each clone for Hist1h2ba-2			methylation status (%) of each clone for Sycp1			methylation status (%) of each clone for Taf7l
oil	DEHP		oil	DEHP		oil	DEHP		oil	DEHP
0	0		0	0		0	0		0	0
0	0		0	0		0	0		0	0
0	0		0	0		0	0		0	0
0	0		0	0		0	0		0	0
0	0		0	0		0	0		0	0
0	0		0	0		0	0		0	0
0	0		0	0		0	0		0	0
0	0		0	0		0	4.3		0	0
0	0		0	4.3		0	4.3		0	0
0	0		0	4.3		0	8.7		0	0
0	0		0	4.3		0	13		0	0
0	0		0	4.3		0	13		0	0
0	0		0	4.3		0	13		0	0
0	0		0	4.3		0	13		0	0
0	0		0	8.7		0	13.6		0	0
0	0		0	56.5		0	26.1		0	0
0	9.1		0	82.6		4.3	34.8		0	0
0	9.1		0	87		4.3	69.6		0	12.5
0	27.3		0	91.3		4.3	78.3		0	37.5
0	63.6		0	91.3		4.3	78.3		0	50
0	63.6		0	91.3		4.3	78.3		0	62.5
0	63.6		0	91.3		4.3	78.3		0	75
0	72.7		0	91.3		13	82.6		0	75
0	72.7		0	91.3		13	82.6		0	87.5
0	81.8		4.3	95.7		13	82.6		0	87.5
0	90.9		4.3	95.7		13	82.6		0	87.5
0	90.9		4.3	95.7		17.4	82.6		25	100
0	90.9		4.3	95.7		30.4	82.6		37.5	100
9.1	90.9		4.3	95.7		69.6	87		37.5	100
9.1	90.9		4.3	95.7		69.6	87		37.5	100
9.1	90.9		4.3	100		73.9	87		62.5	100
9.1	90.9		4.3	100		73.9	87		62.5	100
9.1	100		65.2	100		82.6	87		87.5	100
9.1	100		82.6	100		82.6	87		87.5	100
9.1	100		91.3	100		87	87		87.5	100
18.2	100		91.3	100		87	87		87.5	100
18.2	100		100	100		87	87		87.5	100
63.6	100		100	100		87	87		87.5	100
100	100		100	100		91.3	87		87.5	100
100	100		100	100		95.7	87		100	100
100	100		100	100		95.7	87		100	100
100	100		100	100		100	91.3		100	100
100	100		100	100		100	91.3		100	100
100	100			100		100	91.3		100	100
				100		100	91.3		100
				100		100	91.3		100
				100		100	95.7		100
						100	95.7		100
						100	95.7
							95.7
							95.7
							95.7
							95.7
							100
							100
