# Supplementary material for: Epi-mutations for spermatogenic defects by maternal exposure to di(2-ethylhexyl) phthalate
Source: eLife. 2021 Jul 28;10:e70322. doi: 10.7554/eLife.70322 (PMC8318585; doi:10.7554/eLife.70322)
Supplement: Figure 5—source data 1. — SPG: spermatogonia; SPC: spermatocytes; RS: round spermatids. [file elife-70322-fig5-data1.xlsx]

## Sheet: Figure 5A
Numerical source data for Hist1h2ba methylation (%) in each stage of germ cells
gene	E19.5-Oil-1	E19.5-Oil-2	E19.5-DEHP-1	E19.5-DEHP-2	SPG-Oil-1	SPG-Oil-2	SPG-DEHP-1	SPG-DEHP-2	SPC-Oil-1	SPC-Oil-2	SPC-DEHP-1	SPC-DEHP-2	RS-Oil-1	RS-Oil-2	RS-DEHP-1	RS-DEHP-2
Hist1h2ba	8.15272	10.5385	13.4069	16.3559	11.5429	27.5103	44.1394	18.2262	1.38279	2.90331	1.72163	2.7298	1.10208	2.62269	1.56769	1.36071
SPG: Spermatogonia
SPC: Spermatocyte
RS: Round spermatid

## Sheet: Figure 5B
Numerical source data for Sycp1 methylation (%) in each stage of germ cells
gene	E19.5-Oil-1	E19.5-Oil-2	E19.5-DEHP-1	E19.5-DEHP-2	SPG-Oil-1	SPG-Oil-2	SPG-DEHP-1	SPG-DEHP-2	SPC-Oil-1	SPC-Oil-2	SPC-DEHP-1	SPC-DEHP-2	RS-Oil-1	RS-Oil-2	RS-DEHP-1	RS-DEHP-2
Sycp1	14.3024	9.23318	22.0196	29.272	12.0193	22.6543	39.8425	17.6183	2.98595	2.08765	3.85855	1.0839	1.28106	1.78014	0.973156	2.40057
SPG: Spermatogonia
SPC: Spermatocyte
RS: Round spermatid

## Sheet: Figure 5C
Numerical source data for Taf7l methylation (%) in each stage of germ cells
gene	E19.5-Oil-1	E19.5-Oil-2	E19.5-DEHP-1	E19.5-DEHP-2	SPG-Oil-1	SPG-Oil-2	SPG-DEHP-1	SPG-DEHP-2	SPC-Oil-1	SPC-Oil-2	SPC-DEHP-1	SPC-DEHP-2	RS-Oil-1	RS-Oil-2	RS-DEHP-1	RS-DEHP-2
Taf7l	4.38448	6.49957	20.8955	8.56641	9.30881	14.7722	24.6154	12.4359	0.706436	1.02564	7.11992	1.66167	0	1.86652	2.12642	1.33483
SPG: Spermatogonia
SPC: Spermatocyte
RS: Round spermatid
