# Supplementary material for: Epi-mutations for spermatogenic defects by maternal exposure to di(2-ethylhexyl) phthalate
Source: eLife. 2021 Jul 28;10:e70322. doi: 10.7554/eLife.70322 (PMC8318585; doi:10.7554/eLife.70322)
Supplement: Figure 6—source data 1. [file elife-70322-fig6-data1.xlsx]

## Sheet: Figure 6B
Numerical source data for relative luciferase activity of Hist1h2ba (Unmethyl as 1)				Kolmogorov-Smirnov test
sample	relative luciferase activiry			sample	p-value
Unmethyl	0.994306			Unmethyl	0.520098
Unmethyl	0.912375			Methyl	0.53628
Unmethyl	1.09332
Methyl	0.293832
Methyl	0.256185
Methyl	0.256185

## Sheet: Figure 6C
Numerical source data for relative luciferase activity of Sycp1 (Unmethyl as 1)				Kolmogorov-Smirnov test
sample	relative luciferase activiry			sample	p-value
Unmethyl	0.845209			Unmethyl	0.990669
Unmethyl	1.0774			Methyl	0.69467
Unmethyl	1.0774
Methyl	0.0325428
Methyl	0.0282351
Methyl	0.0282351

## Sheet: Figure 6D
Numerical source data for relative luciferase activity of Taf7l (Unmethyl as 1)				Kolmogorov-Smirnov test
sample	relative luciferase activiry			sample	p-value
Unmethyl	0.733544			Unmethyl	0.987948
Unmethyl	1.27024			Methyl	0.499426
Unmethyl	0.996216
Methyl	0.103676
Methyl	0.0508026
Methyl	0.0400374
