# Supplementary material for: Epi-mutations for spermatogenic defects by maternal exposure to di(2-ethylhexyl) phthalate
Source: eLife. 2021 Jul 28;10:e70322. doi: 10.7554/eLife.70322 (PMC8318585; doi:10.7554/eLife.70322)
Supplement: Supplementary file 1. [file elife-70322-supp1.xlsx]

## Sheet: Sheet1
Supplementary file 1. Methylation levels (%) of various genomic reagions.
Region	E19.5-germ oil	E19.5-germ DEHP	E19.5-soma oil	E19.5-soma DEHP	SPG oil	SPG DEHP	SPC oil	SPC DEHP	RS oil	RS DEHP
All	5.68263	5.86775	9.31932	9.3833	7.44246	8.14186	5.31982	5.76023	5.62524	5.65062
Promoter	1.78016	1.73206	2.09763	2.15729	2.79105	3.05438	1.87626	1.8871	1.81969	1.9353
Gene body	4.86272	4.99085	7.72649	7.79514	6.55226	7.17604	4.69663	5.05461	4.94257	5.03722
CGI	1.81679	1.81466	2.83093	2.89044	3.22828	3.59918	1.95211	1.97715	1.87997	1.99102
CGI shore	3.28536	3.44963	7.04585	7.13166	6.30255	7.12136	3.65529	3.93367	3.73856	3.85734
SINE	34.0944	35.3541	53.2127	53.2728	33.8648	36.3697	28.1727	31.0397	31.2944	31.2617
LINE	48.7244	50.4103	74.5071	74.5238	59.3439	59.8145	51.0403	53.3928	54.8973	52.1204
LTR	39.0723	41.5454	75.9944	75.9376	46.2292	48.7488	35.7579	39.0001	38.3718	36.5445
Values are the means of two runs by different samples.
SPG: spermatogonia; SPC: spermatocyte; RS: round spermatid.
