# Supplementary material for: Epi-mutations for spermatogenic defects by maternal exposure to di(2-ethylhexyl) phthalate
Source: eLife. 2021 Jul 28;10:e70322. doi: 10.7554/eLife.70322 (PMC8318585; doi:10.7554/eLife.70322)
Supplement: Supplementary file 2. [file elife-70322-supp2.xlsx]

## Sheet: germ_hyper
Supplementary file 2. (A) List of hyper- (DEHP-oil (%) > 5) methylated genes in E19.5 testicular germ cells.
chr	start	end	Gene symbol	DEHP-oil (%)
chr6	86627675	86628674	Asprv1	30.1886
chr13	29015756	29016755	A330102I10Rik	18.5081
chr15	3303026	3304026	Ccdc152	15.4667
chrX	38120341	38121340	Rhox13	14.0044
chr3	102935600	102936600	Sycp1	13.878
chr17	63937473	63938472	Fer	11.8196
chrX	37901270	37902270	Rhox9	11.5281
chr9	40332973	40333972	1700110K17Rik	11.3219
chr5	65347912	65348911	Klb	11.2518
chr2	84658580	84659579	Btbd18	10.7442
chr19	56825710	56826709	Tdrd1	10.5807
chr19	56825776	56826775	Tdrd1	10.5807
chr19	56825787	56826786	Tdrd1	10.5807
chr9	98856092	98857091	Prr23a2	10.3561
chr7	127603945	127604945	1700120K04Rik	10.1907
chr8	121541454	121542454	1700018B08Rik	10.0171
chr17	25471091	25472090	Tekt4	9.95122
chr8	119612248	119613247	Adad2	9.46894
chr8	45818797	45819797	Sorbs2os	9.427
chr11	97775418	97776418	1700001P01Rik	9.35572
chrX	134475990	134476990	Taf7l	9.28894
chr8	20296932	20297932	6820431F20Rik	9.08629
chr1	182748680	182749680	Ccdc185	9.07821
chr18	77281459	77282458	Loxhd1	9.07386
chr2	164199617	164200617	Wfdc15a	8.93613
chr11	99350594	99351594	Krt27	8.9192
chr3	41555235	41556234	Jade1	8.79273
chr13	67862827	67863826	BC048507	8.74018
chr2	174297360	174298359	Gnas	8.667
chr11	77776736	77777735	Myo18a	8.33448
chr7	45693902	45694902	Sec1	8.25693
chrX	157568485	157569485	Yy2	8.22223
chr4	107683662	107684662	Dmrtb1	8.19474
chr1	23101753	23102753	4933415F23Rik	8.01021
chr11	87616665	87617664	Hsf5	7.85802
chr2	172979343	172980342	Spo11	7.78182
chr11	34207589	34208589	Foxi1	7.77993
chr15	100352701	100353700	Methig1	7.70038
chr15	100352701	100353700	Mettl7a2	7.70038
chr6	18108561	18109561	Asz1	7.67002
chrX	155032792	155033792	Magea2	7.63685
chr14	33588771	33589770	Ptpn20	7.56482
chr7	143460550	143461550	Cdkn1c	7.5
chr3	48608600	48609600	1700018B24Rik	7.49652
chr14	54711674	54712674	Cebpe	7.44971
chr11	99337465	99338465	Krt26	7.43867
chr10	61174763	61175762	Tbata	7.41627
chrX	6082920	6083920	AU022751	7.39704
chr9	108953246	108954245	Col7a1	7.37714
chr13	23933963	23934962	Hist1h2aa	7.29034
chr15	100280338	100281337	Tmprss12	7.13832
chr14	73025104	73026103	Gm9199	7.13755
chrX	140812933	140813933	Tex13	7.08017
chr17	46909986	46910985	Prph2	6.95356
chr13	23697958	23698958	Hist1h4c	6.83761
chr13	95478155	95479155	S100z	6.7618
chr3	55181545	55182544	Sohlh2	6.75859
chr7	43791392	43792391	Klk9	6.53288
chr12	11437734	11438733	4930511A02Rik	6.2936
chr17	24886982	24887981	Spsb3	6.23423
chr6	135309884	135310884	Pbp2	6.17482
chr5	107829663	107830662	Ube2d2b	6.03621
chr19	61227918	61228918	Csf2ra	5.95019
chr18	36991968	36992967	Pcdha8	5.79735
chr6	58906626	58907626	Nap1l5	5.77431
chr6	138657944	138658944	Igbp1b	5.74451
chr10	52545239	52546239	Zfa-ps	5.64671
chr9	122746847	122747846	Topaz1	5.59463
chr13	23933656	23934656	Hist1h2ba	5.53579
chr14	51988329	51989329	Gm16617	5.51125
chr3	8462598	8463598	Gm6194	5.50742
chrX	51800733	51801733	Usp26	5.50009
chr13	24905101	24906100	4932702P03Rik	5.30792
chr3	153905638	153906638	Msh4	5.26967
chr13	112651810	112652810	Ddx4	5.25395
chr4	145836720	145837719	Gm13238	5.21454
chr2	127424700	127425699	Gpat2	5.19607
chr10	25298663	25299663	Akap7	5.1391
chr8	4612671	4613670	Zfp958	5.07455
chr2	157559579	157560578	Nnat	5.02842

## Sheet: germ_hypo
Supplementary file 2. (B) List of hypo- (DEHP-oil (%) < -5) methylated genes in E19.5 testicular germ cells.
chr	start	end	Gene symbol	DEHP-oil (%)
chr19	47143674	47144674	Calhm1	-11.5369
chr5	115185621	115186621	Cabp1	-8.91661
chr15	79165567	79166566	Gm10863	-8.37117
chr7	60004656	60005656	Snrpn	-8.33446
chr7	60004656	60005656	Snurf	-8.33446
chr5	139812743	139813743	Tmem184a	-8.23362
chr7	144283886	144284885	Shank2	-7.56781
chr10	81291081	81292081	Tjp3	-7.56663
chr5	114813476	114814476	1500011B03Rik	-7.23155
chr7	100657956	100658956	Plekhb1	-6.60902
chr2	38714042	38715042	Nr5a1	-6.55394
chr17	27028760	27029759	Ggnbp1	-6.26743
chr9	50752472	50753471	Cryab	-6.1156
chr11	117483869	117484868	Gm11733	-6.0757
chr11	80508606	80509606	C030013C21Rik	-5.9897
chr2	180289379	180290379	Rbbp8nl	-5.84143
chr6	90618747	90619746	Slc41a3	-5.41871
chr11	120361035	120362034	Fscn2	-5.28966
chr8	20424314	20425314	2610005L07Rik	-5.24374
chr9	112187266	112188266	Arpp21	-5.10487
chr9	112187426	112188426	Arpp21	-5.10487
chr9	112187429	112188429	Arpp21	-5.10487

## Sheet: soma_hyper
Supplementary file 2. (C) List of hyper- (DEHP-oil (%) > 5) methylated genes in E19.5 testicular somatic cells.
chr	start	end	Gene symbol	DEHP-oil (%)
chr5	115185621	115186621	Cabp1	21.2982
chr11	88293544	88294543	1700106J16Rik	19.6824
chr2	174283821	174284820	Gnas	10.6362
chr7	62347778	62348777	Ndn	10.3848
chr2	130803601	130804601	Gm14057	8.96723
chr16	18590171	18591171	Tbx1	8.92845
chr14	54711674	54712674	Cebpe	8.8399
chr2	38714042	38715042	Nr5a1	7.79752
chr2	163606713	163607712	Ttpal	7.71802
chr10	128908846	128909845	Cd63	7.61371
chr18	37689360	37690359	Pcdhgb2	7.28077
chr8	27142411	27143410	4933416M07Rik	6.73328
chr18	37736437	37737436	Pcdhga9	6.59429
chr17	63937473	63938472	Fer	6.31598
chr17	45601567	45602567	Gm7325	6.216
chr17	45601602	45602602	Gm7325	6.216
chr7	62419639	62420639	Mkrn3	5.93153
chr6	58906626	58907626	Nap1l5	5.785
chr10	61174763	61175762	Tbata	5.76849
chr6	29059722	29060721	Lep	5.60507
chr9	21066593	21067593	Zglp1	5.41658
chr17	45601415	45602415	Gm7325	5.27092
chr10	13090289	13091288	Plagl1	5.03919
chr10	13090346	13091345	Hymai	5.03919

## Sheet: soma_hypo
Supplementary file 2. (D) List of hypo- (DEHP-oil (%) < -5) methylated genes in E19.5 testicular somatic cells.
chr	start	end	Gene symbol	DEHP-oil (%)
chr11	83040033	83041033	Slfn10-ps	-8.35458
chr18	37264499	37265498	Pcdhb1	-7.90767
chr19	47143674	47144674	Calhm1	-7.45435
chr2	174327269	174328268	Gnas	-7.03871
chr11	99337465	99338465	Krt26	-6.51987
chr2	174327415	174328414	Gnas	-6.32792
chr19	41895653	41896653	Rrp12	-6.30207
chr5	33103720	33104719	Slc5a1	-6.04872
chr2	177896664	177897663	Gm14327	-6.006
chr2	32646096	32647095	Eng	-5.92366
chr3	88615708	88616707	Arhgef2	-5.69534
chr7	100657956	100658956	Plekhb1	-5.45277
chr3	86001991	86002991	Prss48	-5.08346
