# Supplementary material for: Epi-mutations for spermatogenic defects by maternal exposure to di(2-ethylhexyl) phthalate
Source: eLife. 2021 Jul 28;10:e70322. doi: 10.7554/eLife.70322 (PMC8318585; doi:10.7554/eLife.70322)
Supplement: Supplementary file 3. [file elife-70322-supp3.xlsx]

## Sheet: spermatogonia_hyper
Supplementary file 3. (A) List of hyper- (DEHP-oil (%) > 5) methylated genes in spermatogonia.
chr	start	end	Gene symbol	DEHP-oil (%)
chr12	36089880	36090879	Gm5434	32.0446
chr4	106799331	106800331	Acot11	25.5909
chr13	23933963	23934962	Hist1h2aa	22.3972
chr15	3303026	3304026	Ccdc152	20.1644
chr5	107829663	107830662	Ube2d2b	17.0629
chr18	37736437	37737436	Pcdhga9	16.5833
chr3	153905638	153906638	Msh4	14.9995
chr7	24636071	24637070	Lypd3	14.9656
chr4	149675589	149676589	Pik3cd	14.6555
chr19	56825710	56826709	Tdrd1	14.4774
chr19	56825776	56826775	Tdrd1	14.4774
chr19	56825787	56826786	Tdrd1	14.4774
chr10	97692560	97693559	Ccer1	14.0182
chr15	100935772	100936771	Scn8a	13.6392
chr12	65225018	65226017	Wdr20rt	13.6272
chr15	101411904	101412903	Krt7	12.7831
chr11	121829719	121830718	Ptchd3	12.7262
chr1	55362207	55363207	Boll	12.5612
chr1	15311953	15312952	Kcnb2	11.6877
chr11	120607978	120608977	Npb	11.67
chr13	23933656	23934656	Hist1h2ba	11.6562
chr1	23101753	23102753	4933415F23Rik	11.5475
chr11	3487728	3488727	Pla2g3	11.5245
chr19	5503287	5504287	1700020D05Rik	11.495
chr3	102935600	102936600	Sycp1	11.3936
chr11	121145644	121146643	Tex19.1	11.3205
chr6	125285542	125286542	Tuba3a	11.2235
chr3	40708372	40709371	Slc25a31	11.1281
chr10	81811687	81812686	Gm10778	11.0686
chr9	75347259	75348258	Bcl2l10	11.0525
chr4	133220310	133221309	Cd164l2	10.6098
chr17	34913967	34914966	Slc44a4	10.5374
chr6	85075642	85076641	Npm3-ps1	10.4144
chr10	88459088	88460087	Sycp3	10.1172
chr17	46728665	46729665	Gnmt	10.016
chr17	57087282	57088282	Tubb4a	9.96983
chr12	20815279	20816279	1700030C10Rik	9.90008
chr1	166238244	166239244	Mael	9.56766
chr3	95559178	95560177	Hormad1	9.50552
chr17	45601567	45602567	Gm7325	9.49035
chr17	45601602	45602602	Gm7325	9.49035
chr10	127189554	127190554	Arhgef25	9.31925
chr9	21066593	21067593	Zglp1	9.2889
chr6	135309884	135310884	Pbp2	9.23411
chr5	135349375	135350375	Fkbp6	9.18698
chr5	135349544	135350544	Fkbp6	9.18698
chr4	135495488	135496487	Stpg1	9.10374
chr11	88169066	88170065	Cuedc1	9.04673
chr4	130047341	130048340	Col16a1	9.02636
chr7	81057101	81058100	Alpk3	8.92346
chr4	146067025	146068024	Gm13034	8.92165
chr7	127603945	127604945	1700120K04Rik	8.89628
chr6	113501318	113502318	Prrt3	8.82308
chr6	113501431	113502431	Prrt3	8.82308
chr12	4768767	4769767	Fam228b	8.64885
chr12	4768796	4769795	Pfn4	8.64885
chr17	68273298	68274297	L3mbtl4	8.56562
chr15	59306449	59307448	Zfp572	8.50948
chr13	95478155	95479155	S100z	8.4599
chr4	107683662	107684662	Dmrtb1	8.37242
chrX	140812933	140813933	Tex13	8.33288
chr12	18514011	18515010	5730507C01Rik	8.2768
chr19	61175809	61176809	Gm7102	8.2644
chr7	3422945	3423945	3300002P13Rik	8.26427
chr6	145615464	145616463	Tuba3b	8.25219
chr8	125669319	125670318	Map10	8.20467
chr2	174297360	174298359	Gnas	8.16526
chr19	6924880	6925880	Tex40	8.14773
chr10	61174763	61175762	Tbata	8.04882
chr2	9880747	9881746	4930412O13Rik	8.04061
chr9	98856092	98857091	Prr23a2	8.03014
chr5	123488826	123489825	Lrrc43	7.97019
chr13	55209283	55210282	Nsd1	7.86031
chr19	5297832	5298831	Gal3st3	7.83701
chr17	45601415	45602415	Gm7325	7.79753
chr4	145836720	145837719	Gm13238	7.74737
chr18	36663561	36664560	Eif4ebp3	7.69816
chr16	60605031	60606031	Epha6	7.67193
chr4	126324699	126325699	Tekt2	7.67071
chr8	84001207	84002206	1700067K01Rik	7.63857
chr16	10796323	10797323	Prm1	7.58548
chr11	99350594	99351594	Krt27	7.57099
chr7	25071869	25072869	Grik5	7.55391
chr1	154725420	154726420	Cacna1e	7.54732
chr7	51510530	51511529	Ano5	7.52151
chr7	4777641	4778641	Il11	7.51771
chr4	129490691	129491690	Fam229a	7.51621
chr9	96752331	96753331	E030011O05Rik	7.3467
chr3	126363353	126364352	Arsj	7.27508
chr3	88492812	88493812	Lmna	7.27481
chr19	18749484	18750483	Trpm6	7.22437
chrX	152368529	152369528	3010001F23Rik	7.20155
chr19	61227918	61228918	Csf2ra	7.18701
chr12	29937537	29938536	Pxdn	7.1407
chr7	43791392	43792391	Klk9	7.12281
chr1	82586349	82587349	Col4a4	7.09812
chr1	82586422	82587421	Col4a3	7.09812
chr11	3370892	3371892	Limk2	7.04499
chr17	88791476	88792476	Lhcgr	7.04072
chr11	69119954	69120953	Hes7	7.01719
chr9	14770530	14771530	1700012B09Rik	7.00166
chrX	52790701	52791700	Ccdc160	6.99436
chr4	129490270	129491270	Tssk3	6.96745
chr2	152932708	152933708	Foxs1	6.94178
chr15	87543800	87544799	Fam19a5	6.87303
chr14	33588771	33589770	Ptpn20	6.8654
chr1	39720489	39721489	Rfx8	6.79967
chr8	110167706	110168706	Calb2	6.79232
chr3	54155558	54156557	Trpc4	6.63359
chr11	57831647	57832647	Hand1	6.62889
chr7	44374530	44375530	1700008O03Rik	6.61098
chr17	50293120	50294120	Dazl	6.61045
chr1	15892222	15893222	Sbspon	6.59974
chr1	75374515	75375515	Gm15179	6.5761
chr2	122637388	122638387	AA467197	6.56649
chr6	113391998	113392997	Ttll3	6.55851
chr1	135324314	135325313	Lmod1	6.5583
chrX	134475990	134476990	Taf7l	6.48516
chr10	22272975	22273974	H60b	6.4146
chr9	110857468	110858467	Prss50	6.36893
chr9	45935558	45936558	Tagln	6.35384
chr19	59219149	59220148	Kcnk18	6.28595
chr15	88599803	88600802	Zdhhc25	6.2478
chr8	70072425	70073424	Tm6sf2	6.21863
chr7	14621978	14622978	Nlrp5-ps	6.20712
chr2	167188318	167189318	Kcnb1	6.18626
chr19	41895653	41896653	Rrp12	6.15431
chr17	56511983	56512983	Znrf4	6.12767
chr14	48662372	48663372	Otx2	6.10416
chr9	4795734	4796734	Gria4	6.0922
chr7	107208946	107209945	Rbmxl2	6.06254
chr4	85204957	85205956	Sh3gl2	6.06075
chr3	68690925	68691924	Il12a	6.01412
chr11	69236522	69237522	Gucy2e	5.99997
chr4	104912957	104913956	1700024P16Rik	5.9438
chr7	14622566	14623566	Nlrp5-ps	5.94066
chr11	68555687	68556686	Mfsd6l	5.89644
chr4	153482330	153483330	Ajap1	5.86028
chr14	55712992	55713992	Tgm1	5.83962
chr5	90758799	90759798	Cxcl5	5.82014
chrX	36743133	36744132	Slc25a43	5.79209
chr7	45759055	45760055	Sult2b1	5.76031
chr18	37661446	37662445	Pcdhga1	5.75627
chr10	127189323	127190323	Arhgef25	5.74506
chr2	25094705	25095705	Noxa1	5.69693
chr3	88364090	88365089	Paqr6	5.68946
chr7	101817814	101818813	Phox2a	5.6777
chr15	91049451	91050451	Kif21a	5.659
chr18	4375093	4376092	Mtpap	5.64914
chr7	62419639	62420639	Mkrn3	5.59722
chr10	85597912	85598911	Btbd11	5.56127
chr2	172042966	172043966	Cbln4	5.53724
chr3	41555235	41556234	Jade1	5.52939
chrX	81070145	81071144	Tmem47	5.52128
chrX	101298680	101299679	Nlgn3	5.50097
chr2	112261427	112262426	Nop10	5.49228
chr2	157559579	157560578	Nnat	5.48205
chr10	78591464	78592464	Syde1	5.43526
chr14	55712588	55713588	Tgm1	5.42362
chr16	72662650	72663649	Robo1	5.419
chr5	139813783	139814783	Tmem184a	5.38967
chr4	49845269	49846269	Grin3a	5.38208
chr15	76456939	76457938	Scx	5.37669
chr6	18108561	18109561	Asz1	5.36702
chr11	72313945	72314944	Fbxo39	5.35326
chr12	103314460	103315459	Fam181a	5.301
chr18	37725207	37726206	Pcdhga8	5.30005
chr11	81967896	81968896	Asic2	5.2951
chr3	95240609	95241609	Gm128	5.28437
chr4	99655800	99656799	Foxd3	5.25511
chr3	152265820	152266820	Nexn	5.24668
chr1	9299377	9300377	Sntg1	5.23978
chr6	83711701	83712701	Vax2os	5.23711
chr10	117044842	117045841	Lrrc10	5.22849
chr5	31107820	31108819	Dnajc5g	5.2244
chr10	76388516	76389515	1700094J05Rik	5.21338
chr9	21247943	21248943	S1pr5	5.2065
chr8	102784611	102785611	Cdh11	5.19369
chrX	8175681	8176681	Tbc1d25	5.15243
chr7	114745267	114746266	Insc	5.12098
chr13	42709082	42710081	Phactr1	5.11475
chr12	11437734	11438733	4930511A02Rik	5.08879
chr3	67891721	67892720	Gm21949	5.08748
chr3	67891721	67892720	Iqcj	5.08748
chr17	67353959	67354959	Ptprm	5.07496
chr3	118561679	118562678	Dpyd	5.07332
chr2	107290090	107291089	Kcna4	5.05159
chr11	94564575	94565574	Chad	5.05038
chr14	124192046	124193046	Fgf14	5.02834
chr15	101438304	101439304	Krt83	5.01086
chr4	119359394	119360394	Ccdc30	5.00101

## Sheet: spermatocyte_hyper
Supplementary file 3. (B) List of hyper- (DEHP-oil (%) > 5) methylated genes in spermatocyte.
chr	start	end	Gene symbol	DEHP-oil (%)
chr15	76205821	76206821	Plec	31.7739
chr7	144283886	144284885	Shank2	30.7751
chr16	10796323	10797323	Prm1	28.6333
chr13	119488361	119489360	Gm7120	22.208
chr8	20296932	20297932	6820431F20Rik	21.3294
chr13	119487884	119488884	3110070M22Rik	19.0861
chr7	127603945	127604945	1700120K04Rik	18.4141
chr13	119487540	119488539	Gm7120	18.3226
chr17	35242318	35243317	Ddx39b	18.0037
chr11	117331814	117332813	2020-09-09	17.6355
chr15	88599803	88600802	Zdhhc25	16.8647
chr7	100657956	100658956	Plekhb1	16.6582
chr4	106799331	106800331	Acot11	15.5025
chr19	61175809	61176809	Gm7102	13.3296
chr4	155345289	155346289	Prkcz	12.1841
chr2	25355832	25356832	Dpp7	12.0703
chr3	67891721	67892720	Gm21949	11.0375
chr3	67891721	67892720	Iqcj	11.0375
chr1	88406520	88407519	Spp2	10.3763
chr17	39842498	39843497	Rn45s	9.87523
chr7	130692057	130693056	Tacc2	9.78279
chr16	42955081	42956080	BC002163	9.49813
chr9	96752331	96753331	E030011O05Rik	8.76268
chr9	45935558	45936558	Tagln	8.39771
chrX	139998095	139999095	Rbm41	8.08591
chr7	24660795	24661794	Gm4598	7.98748
chr11	3487728	3488727	Pla2g3	7.6845
chr2	30902797	30903797	Ptges	7.40621
chr12	103314460	103315459	Fam181a	7.10453
chr13	73327982	73328982	Ndufs6	6.83086
chr11	3192963	3193963	Sfi1	6.7881
chr7	43791392	43792391	Klk9	6.73879
chr2	180289379	180290379	Rbbp8nl	6.52949
chr6	83085866	83086865	Lbx2	6.28557
chr15	101939824	101940824	Krt79	6.27086
chr10	81267673	81268672	Apba3	6.24357
chr15	62218951	62219951	H2afy3	6.24284
chr7	24081398	24082397	Zfp180	5.92324
chr5	123046320	123047320	Morn3	5.72303
chr18	60925133	60926132	Camk2a	5.68022
chr11	94499474	94500474	Epn3	5.54891
chr4	120160925	120161924	Edn2	5.18292
chr8	23034600	23035599	Ank1	5.01897

## Sheet: round speratid_hyper
Supplementary file 3. (C) List of hyper- (DEHP-oil (%) > 5) methylated genes in round spermatid.
chr	start	end	Gene symbol	DEHP-oil (%)
chr17	35242318	35243317	Ddx39b	15.8965
chr18	60925133	60926132	Camk2a	10.6541

## Sheet: spermatogonia_hypo
Supplementary file 3. (D) List of hypo- (DEHP-oil (%) < -5) methylated genes in spermatogonia.
chr	start	end	Gene symbol	DEHP-oil (%)
chr10	52545239	52546239	Zfa-ps	-18.3174
chr18	60925133	60926132	Camk2a	-12.3695
chr15	83366797	83367797	1700001L05Rik	-9.32217
chr3	86001991	86002991	Prss48	-8.53008
chr4	88760275	88761274	Gm13283	-7.02742
chr14	33978264	33979264	Zfp488	-6.99021
chr7	24671550	24672550	Tex101	-5.84066
chr11	100145419	100146419	Krt19	-5.78713
chr4	120160925	120161924	Edn2	-5.21533
chr11	96298672	96299671	Hoxb6	-5.19735

## Sheet: spermatocyte_hypo
Supplementary file 3. (E) List of hypo- (DEHP-oil (%) < -5) methylated genes in spermatocyte.
chr	start	end	Gene symbol	DEHP-oil (%)
chr4	88760275	88761274	Gm13283	-10.7352

## Sheet: round spermatid_hypo
Supplementary file 3. (F) List of hypo- (DEHP-oil (%) < -5) methylated genes in spermatid.
chr	start	end	Gene symbol	DEHP-oil (%)
chr4	88757345	88758344	Gm13286	-21.7269
chr4	88760275	88761274	Gm13283	-12.0008
chr7	144283886	144284885	Shank2	-11.0031
chr11	97351573	97352573	Gpr179	-10.8273
chr5	139813783	139814783	Tmem184a	-8.6996
chr10	61174763	61175762	Tbata	-7.50618
chr7	127603945	127604945	1700120K04Rik	-6.31405
chr17	34913967	34914966	Slc44a4	-5.98496
chr7	7277789	7278789	Vmn2r29	-5.57343
chr3	67891721	67892720	Gm21949	-5.33956
chr3	67891721	67892720	Iqcj	-5.33956
chr9	96752331	96753331	E030011O05Rik	-5.29981
chr5	114822968	114823968	2610524H06Rik	-5.25507
