# Supplementary material for: Epi-mutations for spermatogenic defects by maternal exposure to di(2-ethylhexyl) phthalate
Source: eLife. 2021 Jul 28;10:e70322. doi: 10.7554/eLife.70322 (PMC8318585; doi:10.7554/eLife.70322)
Supplement: Supplementary file 4. [file elife-70322-supp4.xlsx]

## Sheet: E19.5 germ_down
Supplementary file 4. (A) List of down-regulated genes in E19.5 germ cells (log2-fold-change < -1, FDR < 0.05).
Gene symbol	logFC	FDR
Gm13139	-6.76643	0.0439676

## Sheet: spermatogonia_down
Supplementary file 4. (B) List of down-regulated genes in spermatocyte (log2-fold-change < -1, FDR < 0.05).
Gene symbol	logFC	FDR
Dsn	-1.68923	0.0328883

## Sheet: spermatocyte_down
Supplementary file 4. (C) List of down-regulated genes in spermatocyte (log2-fold-change < -1, FDR < 0.05).
Gene symbol	logFC	FDR
Sepp1	-1.44912	0.00404136
Cxcl14	-2.34957	0.00597827
Gng11	-4.22173	0.009372
Cml5	-3.38134	0.011776
Cav2	-2.074	0.0171521
Scd2	-1.24286	0.018729
Rarres2	-2.0029	0.018729
Ndrg2	-1.56192	0.021323
Sct	-2.36837	0.0229369
Fgl2	-1.16792	0.0229858
Apoe	-1.12586	0.0255952
Ldhb	-1.13288	0.0258175
Il17a	-5.89862	0.0284108
9230104L09Rik	-1.66772	0.0294253
Cyp17a1	-1.52549	0.029612
Myh11	-1.33583	0.0304856
Cxx1c	-2.13525	0.0320061
Aldh1a1	-1.4414	0.0325943
Fmo1	-1.81564	0.0343726
Olfml1	-1.80645	0.0364342
Akr1cl	-1.46729	0.0392069
Timp2	-1.3079	0.0394006
Serpina5	-1.48558	0.0396066
Ces1d	-1.76626	0.0398691
Slc16a2	-1.59693	0.0423324
Acta2	-1.50584	0.0439707
Lamc3	-1.41152	0.0446657
Ctgf	-1.48126	0.0456917
Cyp26b1	-1.2351	0.0458079
Hao2	-1.81797	0.0483388
Nfib	-1.21599	0.0495457
Cyr61	-1.34856	0.049774

## Sheet: round spermatid_down
Supplementary file 4. (D) List of down-regulated genes in round spermatid (log2-fold-change < -1, FDR < 0.05).
Gene symbol	logFC	FDR
Lrrd1	-1.68081	5.26604e-42
Dyrk4	-1.57068	1.3495e-38
Cd109	-1.49836	7.39583e-35
Lzts2	-1.55436	4.28045e-34
Cst9	-3.03173	6.36707e-31
Csrnp1	-1.2706	9.74711e-30
Edrf1	-1.46229	1.07641e-28
Gxylt2	-1.66303	1.22448e-28
Cd46	-1.78096	2.55772e-28
Pex5l	-1.29397	4.33857e-28
Mex3c	-1.13236	5.50603e-28
Tmco5b	-1.62412	3.56528e-27
Eaf1	-1.50282	4.37068e-27
Saxo1	-1.25853	4.50656e-27
Gm7073	-1.29549	1.45525e-26
Aard	-2.8648	1.15919e-25
Srgn	-1.56342	1.80361e-25
Tmem144	-1.33473	8.2837e-25
1700006E09Rik	-1.21765	9.71638e-25
Adam6b	-1.20539	1.56911e-24
1700122O11Rik	-1.56299	2.3589e-24
P2rx3	-1.22692	9.01357e-24
Hdac11	-1.09754	9.01357e-24
Zfp219	-1.4247	1.00032e-23
Rps6ka1	-1.09766	2.42034e-23
1700101O22Rik	-1.27038	2.72655e-23
4930405D11Rik	-1.48502	6.07582e-23
Gm527	-1.03185	6.56744e-23
4933436H12Rik	-1.49265	8.09646e-23
Jup	-1.36927	1.1191e-22
Zfp513	-1.11284	1.23898e-22
Spata25	-1.16673	2.64127e-22
Sox5os3	-1.24719	2.95102e-22
Otud1	-1.24084	3.00068e-22
Rad21	-1.12404	3.63966e-22
Zswim6	-1.02006	7.94201e-22
Osbpl7	-1.52155	8.0049e-22
Col9a3	-1.4812	1.26673e-21
Chd7	-1.25545	1.38852e-21
Dennd6b	-1.22191	1.84937e-21
Tex29	-1.07574	1.86164e-21
Fdps	-1.13074	1.91557e-21
Arhgap30	-1.3726	1.93553e-21
Kbtbd7	-1.76603	2.08095e-21
Slc36a3	-1.40735	4.39007e-21
Pip5kl1	-1.3926	4.85313e-21
Tmem161b	-1.43807	1.62115e-20
Asns	-1.10088	1.69793e-20
Cct8l1	-1.07373	1.73144e-20
4933436I01Rik	-1.17528	2.05329e-20
Tekt5	-1.06511	2.07625e-20
Slc1a5	-1.32819	2.6195e-20
Cyp51	-1.04431	3.88731e-20
4930533B01Rik	-1.62433	4.23832e-20
1700027F06Rik	-1.29699	5.35799e-20
Cd209c	-1.20327	7.27425e-20
Cpxm1	-1.29582	7.82066e-20
Inpp1	-1.21327	8.55045e-20
Pou5f1	-1.31699	1.01892e-19
Slc29a3	-1.31985	1.05427e-19
1700128A07Rik	-1.25439	1.075e-19
Prune	-1.20016	1.075e-19
Tmem184a	-2.38622	1.10222e-19
Fbxo2	-1.13539	1.16865e-19
Tmod1	-1.40499	1.33478e-19
Gstm7	-3.16097	1.45783e-19
Kif15	-1.03967	1.69351e-19
Ubxn8	-1.17898	3.30824e-19
Galc	-1.18711	4.20467e-19
Tfe3	-1.51315	5.51845e-19
Fam71b	-1.07218	8.66417e-19
Unc80	-1.24322	8.79855e-19
Klf5	-1.14714	1.02051e-18
Ccdc159	-1.12126	1.13136e-18
Lemd1	-1.05707	1.45493e-18
Adam6a	-1.12587	1.68291e-18
Tmem123	-1.16226	1.81885e-18
Prcp	-1.37442	1.86852e-18
Itpripl1	-1.15291	2.19257e-18
Cldn11	-3.26955	2.20872e-18
Ctsl	-2.25411	2.21457e-18
Cyb5d1	-1.31907	2.39102e-18
2200002J24Rik	-1.25226	2.56386e-18
Cyp1b1	-1.22795	3.61609e-18
Cst13	-1.16507	4.3322e-18
Cd55	-1.41815	5.40282e-18
Tob1	-1.18337	6.29308e-18
Pabpc1l	-1.4252	6.44774e-18
Banf2	-1.21275	6.95547e-18
Chmp5	-1.20765	8.6888e-18
Cd59a	-1.54101	9.37347e-18
4931428F04Rik	-1.13862	9.40199e-18
4921511C20Rik	-1.04731	1.06512e-17
4933406M09Rik	-1.27688	1.17859e-17
Slc25a41	-1.06599	1.39395e-17
Rora	-1.21696	1.51214e-17
Tmem184c	-1.12565	1.66388e-17
Fam222a	-1.41665	1.78151e-17
Spata31d1c	-1.39582	2.093e-17
Fam71a	-1.22621	2.1183e-17
Gatm	-2.59212	2.15177e-17
4930523C07Rik	-1.08289	2.17023e-17
Ssbp3	-1.13526	3.1826e-17
Fat1	-1.01027	3.60332e-17
Sh3yl1	-1.14107	3.98767e-17
Col15a1	-1.34772	4.64087e-17
Lamp2	-1.37072	6.12646e-17
Hemgn	-1.16938	6.5014e-17
4921530L21Rik	-1.06753	7.69757e-17
Dlg3	-1.24705	7.76181e-17
Plbd1	-1.20749	8.42955e-17
Pkd1	-1.27314	8.65604e-17
Tead2	-1.43164	9.12342e-17
Col27a1	-1.42596	9.9774e-17
Ube2dnl1	-1.2262	1.03547e-16
Nim1k	-1.46064	1.11756e-16
Srsf6	-1.08246	1.70097e-16
Haus7	-1.11375	1.95866e-16
Opn3	-1.37989	2.02603e-16
Ccser2	-1.01921	2.18316e-16
Defb19	-2.96135	2.24491e-16
Ccin	-1.04246	2.34645e-16
Parn	-1.07479	2.55295e-16
Flnb	-1.02663	2.58854e-16
Gabpb1	-1.29801	3.55907e-16
Igsf9	-1.1041	3.60348e-16
Vgll3	-1.16522	3.66977e-16
44445	-3.01268	3.85282e-16
Slc5a4b	-1.01869	5.34711e-16
Bicd2	-1.09689	5.66641e-16
Per1	-1.00053	6.30804e-16
Usf1	-1.82437	9.08698e-16
44448	-2.98534	1.0526e-15
Adam4	-1.07791	1.17166e-15
Gcc1	-1.17522	1.24326e-15
4930513O06Rik	-1.2093	1.24524e-15
Mrps36	-1.2643	1.38829e-15
Rnf148	-1.01761	1.56944e-15
4932435O22Rik	-1.41615	1.65035e-15
Gm12530	-1.59942	1.73602e-15
Dusp10	-1.01588	2.08031e-15
4930412O13Rik	-1.09177	2.70953e-15
Lppr2	-1.16847	3.08782e-15
Fbxo39	-1.02045	3.7425e-15
Gstm6	-3.02565	4.0469e-15
1700061I17Rik	-1.26725	4.21144e-15
4930500F04Rik	-1.1564	4.21144e-15
Phgdh	-1.11455	4.47767e-15
Actrt3	-1.1153	5.97028e-15
Amhr2	-1.62546	6.97009e-15
Kbtbd6	-1.43855	8.54909e-15
Fndc8	-1.01735	9.87127e-15
Runx2	-1.33724	1.01073e-14
4921509C19Rik	-1.04619	1.07507e-14
Ippk	-1.09948	1.17811e-14
Fyn	-2.95188	1.27592e-14
Iqcf6	-1.14861	1.62244e-14
E430018J23Rik	-1.48737	1.64182e-14
1700056E22Rik	-1.06541	1.67621e-14
Slc39a1	-1.10108	1.70008e-14
Mrgbp	-1.20139	1.81501e-14
Slc25a35	-1.00837	2.14054e-14
Fam89a	-1.34857	2.18412e-14
Gm15412	-1.35288	2.26498e-14
Zfhx2	-1.1376	2.40525e-14
Dusp3	-1.0001	2.83524e-14
Slc25a4	-2.26441	3.2182e-14
Adig	-1.17478	3.73425e-14
Rnf5	-1.33447	3.88747e-14
Ppp1r3a	-1.65619	3.91417e-14
Zfp263	-1.02258	3.9794e-14
Cdc42ep5	-1.29272	3.9927e-14
4930548H24Rik	-1.12907	5.05762e-14
Zic5	-1.2461	5.27212e-14
4930465M20Rik	-1.18325	5.27212e-14
Prkag2os1	-1.22413	5.62935e-14
Tmem205	-1.02115	6.1675e-14
Caskin2	-1.19228	6.57568e-14
Hr	-1.52182	6.66359e-14
Dusp21	-1.20837	7.97184e-14
Hdac6	-2.7405	8.04874e-14
Acot12	-1.30852	9.09748e-14
Sipa1l3	-1.0521	9.14868e-14
Tnfrsf13c	-1.1133	1.11092e-13
Zfp28	-1.15206	1.41801e-13
Chrm4	-1.04086	1.42817e-13
Gm13547	-1.07131	1.49375e-13
Crb1	-1.35007	1.60772e-13
Irx5	-1.33249	1.92162e-13
Mkl2	-1.08597	2.12818e-13
Nckap5l	-1.15821	2.48603e-13
Gm9047	-1.24752	2.50081e-13
Dnajc19	-1.11942	2.86176e-13
4930554I06Rik	-1.18018	3.69072e-13
Abca9	-1.04122	3.82421e-13
Ppm1f	-1.02016	3.90308e-13
Gldnos	-1.112	3.90851e-13
4931430N09Rik	-1.31633	4.76136e-13
Cst12	-2.54519	5.01353e-13
Cldn34c1	-1.17645	5.09818e-13
Mex3b	-1.01236	5.41886e-13
Cldn34c4	-1.02455	5.65718e-13
4933402E13Rik	-2.7335	6.26567e-13
Atp2c1	-1.07802	6.55178e-13
Spata31d1b	-1.00902	7.10782e-13
Slc10a2	-1.15414	7.59766e-13
Sppl2a	-1.01596	8.83492e-13
Rad51b	-1.16249	8.95307e-13
Ldhb	-2.38859	9.47044e-13
Cd59b	-1.41431	9.66362e-13
1700006F04Rik	-1.23382	9.91406e-13
Arhgap42	-1.38163	9.93948e-13
4930583K01Rik	-1.4859	1.12065e-12
Tsx	-2.74633	1.1806e-12
Kcnn4	-1.782	1.19313e-12
Wbp2nl	-1.14342	1.38394e-12
Tuba8	-1.10978	1.39796e-12
Samt3	-1.18028	1.44853e-12
4933417G07Rik	-1.26769	1.60757e-12
Rhox8	-1.95818	1.72027e-12
Haus2	-1.14985	1.74511e-12
4930545H06Rik	-1.16832	1.78473e-12
Zmiz1	-1.10122	1.87028e-12
B330016D10Rik	-1.02455	2.192e-12
Arpp19	-1.14097	2.20204e-12
Snhg8	-1.2396	2.29827e-12
Mccc2	-1.02896	2.33566e-12
Atf6	-1.06899	2.70826e-12
Gm14151	-1.06259	3.30529e-12
BC029722	-1.14112	4.04685e-12
4930520P13Rik	-1.57687	4.07465e-12
Gm14057	-1.50194	4.32985e-12
Mllt3	-1.0737	4.80331e-12
Myl9	-3.07077	5.16813e-12
Plin3	-1.21261	5.3224e-12
Aph1a	-1.65324	6.12328e-12
Tfcp2l1	-1.05814	6.1681e-12
Frmd6	-1.34533	6.45526e-12
Tmem104	-1.37625	7.0178e-12
Nfx1	-1.19164	7.16456e-12
Itpr3	-1.00141	7.24416e-12
Tmem86a	-1.38281	7.30967e-12
Gm5460	-1.19283	8.37658e-12
Nsmf	-1.05033	8.42596e-12
Xrcc2	-1.14006	8.91152e-12
Pnp2	-1.22749	9.31833e-12
Rdh10	-1.07632	9.42418e-12
Smok2a	-1.28252	9.44463e-12
Adra1d	-1.0726	1.11875e-11
1700071K01Rik	-1.06384	1.25241e-11
Nexn	-1.36484	2.23059e-11
Trp53tg5	-1.03477	2.36885e-11
Fosb	-1.56408	2.48777e-11
Tmem198	-1.53856	2.66976e-11
Anxa11	-1.10448	2.7866e-11
Trabd2b	-1.16913	3.05085e-11
Cdk18	-1.05187	3.34034e-11
1700025N23Rik	-1.00181	4.62803e-11
Prss23	-1.10419	5.1172e-11
Gm14137	-1.15776	5.21795e-11
B4galnt4	-1.08954	5.95748e-11
Gm6756	-1.05466	6.05047e-11
D930020B18Rik	-1.22799	6.19984e-11
Lrrc69	-1.00956	6.24528e-11
Iqgap3	-1.32278	6.65881e-11
Ptprh	-1.39928	6.84662e-11
Mapt	-1.11856	7.16081e-11
Pth2	-1.09947	7.22113e-11
Creg1	-2.81368	7.57191e-11
Arf5	-1.09111	7.82424e-11
Spns2	-1.23227	8.48504e-11
Gapt	-1.60717	8.73375e-11
Prss37	-1.01482	9.11014e-11
Clu	-2.47387	9.45237e-11
Cd37	-1.1071	1.09977e-10
Itga11	-1.01292	1.31179e-10
Nfia	-1.35911	1.39219e-10
Abat	-2.17098	1.48944e-10
Bmp3	-1.5259	1.49966e-10
1700025C18Rik	-1.05093	1.56883e-10
Fam195a	-1.33066	1.57076e-10
Zc3h7b	-1.57216	1.93172e-10
Slit1	-1.06808	2.17953e-10
4930413F20Rik	-1.1293	2.33156e-10
Peg10	-2.0138	2.55876e-10
Ccr4	-1.52447	2.61051e-10
Fam168a	-1.09369	2.61104e-10
Lmtk3	-1.06199	2.61957e-10
Ivd	-1.10358	2.67693e-10
Adora1	-2.64825	2.70003e-10
Tbx5	-1.0994	2.72435e-10
1700072O05Rik	-1.21957	3.13738e-10
Zfp275	-5.42047	3.42853e-10
Klk1b7-ps	-1.03998	3.43197e-10
Gprc5b	-1.05922	3.44138e-10
Ptprr	-1.93421	4.23022e-10
Leng9	-1.28404	4.94282e-10
Mmd2	-2.7737	5.29228e-10
Rtn2	-1.38729	5.51495e-10
Hspa12b	-1.10635	6.12831e-10
F8a	-1.16326	6.58555e-10
Myo5c	-1.22698	7.12931e-10
Hes1	-1.75486	7.5938e-10
Rasd2	-1.70324	8.30537e-10
Celf2	-1.3321	9.24901e-10
2610028E06Rik	-1.50755	9.29781e-10
Nfil3	-1.1251	9.29828e-10
1700094J05Rik	-1.39851	9.74232e-10
Psap	-1.45133	9.74851e-10
Ddr1	-1.11653	1.02967e-09
Serpina5	-2.43172	1.04419e-09
Plcd1	-1.05922	1.08249e-09
Hmgn5	-3.03184	1.25599e-09
Tceal8	-3.58695	1.33232e-09
Slc36a1	-1.00225	1.3456e-09
Dapl1	-1.0991	1.3995e-09
Adamts9	-1.37544	1.4378e-09
Elmo1	-1.04577	1.57612e-09
Nr0b1	-3.79224	1.6719e-09
Bend4	-2.27089	1.72618e-09
Gm4285	-1.07025	1.75735e-09
Nrg3os	-1.31656	1.77744e-09
Ccdc25	-1.12136	1.85003e-09
Faiml	-1.16823	1.88082e-09
Cux2	-1.18145	1.8847e-09
Defb30	-1.34104	1.91855e-09
1810026J23Rik	-1.01654	1.94922e-09
Slco5a1	-1.17161	2.1419e-09
Malt1	-1.07379	2.23255e-09
Gas6	-2.50938	2.3389e-09
Map2k3os	-1.18568	2.77615e-09
Gsta4	-1.66589	2.7838e-09
Gng12	-2.06284	2.81857e-09
Efnb2	-1.1691	2.93033e-09
1700066J03Rik	-1.19687	2.98728e-09
Slc7a11	-1.16734	3.21606e-09
Ftl1	-1.79589	3.44273e-09
Polr3g	-2.73333	3.58131e-09
Kbtbd3	-1.10631	4.09105e-09
Tspyl2	-2.30794	4.13339e-09
Spryd3	-1.05641	4.22101e-09
Hrh3	-1.37539	4.41753e-09
Zfp362	-1.10284	4.69722e-09
Cdkn2b	-1.53973	4.82472e-09
1700123O12Rik	-1.02421	4.83422e-09
Alpk2	-1.71274	4.88251e-09
Col26a1	-1.13482	5.29116e-09
Ell3	-1.16615	5.7408e-09
Gltscr1	-1.26735	5.76338e-09
Basp1	-2.03463	6.21241e-09
Lyz2	-3.20004	7.70199e-09
Arvcf	-1.36613	8.12519e-09
Smok2b	-1.32197	8.89479e-09
C330007P06Rik	-1.05796	8.95472e-09
1700066N21Rik	-1.50109	9.03569e-09
Mif	-1.06122	1.00077e-08
Klhl23	-2.25393	1.07382e-08
4930447M23Rik	-1.23456	1.14931e-08
Sparc	-2.11676	1.14931e-08
Tgm1	-1.36885	1.17446e-08
Mgst2	-1.48129	1.18208e-08
Cd81	-1.55386	1.19989e-08
Dusp2	-1.30477	1.25158e-08
Cypt4	-1.10019	1.30406e-08
Nxf3	-2.42713	1.33598e-08
Ppara	-1.02167	1.36753e-08
Synpo	-1.05436	1.44671e-08
C1d	-1.4559	1.51335e-08
4931408C20Rik	-1.02026	1.55145e-08
Xaf1	-1.51829	1.60404e-08
Npm3-ps1	-1.30266	1.677e-08
Etd	-3.99796	1.75151e-08
4930480G23Rik	-1.03604	2.1457e-08
Ucp2	-1.78479	2.16604e-08
Cldn13	-1.25414	2.1728e-08
Krt6a	-1.29453	2.42597e-08
1700065J18Rik	-1.13676	2.45903e-08
Cd9	-1.4482	2.53872e-08
St6galnac6	-2.35886	2.60123e-08
Ncoa7	-1.01762	2.69621e-08
Lrrc75a	-1.09061	2.80003e-08
Fzd6	-1.11854	3.0648e-08
Zfp763	-1.5228	3.07485e-08
Cntnap5a	-1.06665	3.16433e-08
Wt1	-2.34337	3.25779e-08
Eaf2	-1.05538	3.28495e-08
Fxyd1	-2.81653	3.31609e-08
F13a1	-1.39311	3.7386e-08
Gm684	-1.07017	3.77596e-08
Prrx1	-1.89737	4.1877e-08
Pkp3	-1.05336	4.22827e-08
C030013C21Rik	-1.16835	4.7649e-08
Rbm3	-1.02197	5.70901e-08
Tmsb15b1	-1.54131	5.75185e-08
Sost	-1.19216	5.75484e-08
Itfg2	-1.10768	5.84437e-08
Prr23a1	-3.00186	5.9685e-08
Olfr1372-ps1	-1.52275	6.02592e-08
Hopx	-3.92008	6.11073e-08
9430091E24Rik	-2.39316	6.17025e-08
Wbp5	-3.0276	6.29074e-08
Ddx3x	-1.20327	6.30505e-08
Defb36	-1.98665	6.30505e-08
C4bp-ps1	-1.2326	6.40383e-08
4930402F06Rik	-1.0601	6.64672e-08
Col6a3	-1.30001	6.65086e-08
Ccdc137	-1.04025	6.99714e-08
Ano2	-1.03154	7.51253e-08
Tm4sf4	-1.42206	7.67418e-08
Cdhr1	-1.28347	8.12301e-08
Tubb5	-2.06496	8.13424e-08
1700112J16Rik	-1.02169	8.48287e-08
Pepd	-1.12248	8.84276e-08
1700057H21Rik	-1.13505	8.91526e-08
Pax1	-1.11177	8.94143e-08
Rhod	-1.07928	9.33235e-08
Zfp735	-1.45382	9.41093e-08
B3glct	-1.76096	9.55391e-08
Pcsk2	-1.11701	9.76455e-08
Casp1	-1.13471	1.11256e-07
Cyp19a1	-1.01805	1.15265e-07
Ppm1m	-2.35743	1.32393e-07
Mageb16	-3.1718	1.35379e-07
9230102O04Rik	-1.25533	1.42415e-07
Kctd12	-2.86808	1.43507e-07
Gm9866	-1.2175	1.46973e-07
4930430J02Rik	-2.01458	1.48997e-07
4930578N18Rik	-1.2664	1.51185e-07
Sox9	-2.89366	1.52093e-07
Dhcr24	-1.36554	1.53665e-07
Cited1	-2.37454	1.59533e-07
Mbnl1	-3.24123	1.65132e-07
Sft2d2	-1.19307	1.77532e-07
Ppm1k	-1.1681	1.79189e-07
Cyb5r1	-2.20129	1.84339e-07
Tac1	-1.25219	1.86451e-07
4930539C22Rik	-1.63522	1.98777e-07
Diap2	-2.30688	1.98777e-07
Padi6	-1.14633	2.10234e-07
Kcnab1	-1.17934	2.17189e-07
Apcdd1	-2.90797	2.18642e-07
Vmn2r71	-2.05208	2.26784e-07
Itpr2	-1.07504	2.27756e-07
Aoc2	-1.1555	2.28995e-07
Gm20594	-1.18343	2.29121e-07
Unc93a	-1.18893	2.45042e-07
Cltb	-1.92717	2.47605e-07
D830030K20Rik	-1.57393	2.57246e-07
Smok4a	-1.24059	2.58075e-07
Grn	-2.61202	2.85365e-07
Ywhag	-1.66017	2.89992e-07
Vim	-1.87365	2.92975e-07
Kctd2	-1.23161	3.03579e-07
Dusp28	-1.06296	3.03684e-07
Trh	-1.47103	3.06863e-07
Mfsd2b	-1.07883	3.23628e-07
Adh5	-2.39716	3.35484e-07
Zfp385b	-1.10336	3.48488e-07
Vdac1	-1.98342	3.50232e-07
Cdh9	-1.40265	3.5024e-07
Dnmt3a	-1.01828	3.7033e-07
Hadh	-2.06953	3.93789e-07
Adk	-1.34618	4.17492e-07
Slc9a4	-1.20712	4.22502e-07
Epas1	-1.30649	4.2298e-07
4930524B17Rik	-1.38062	4.34431e-07
Hgf	-1.451	4.4024e-07
Tm6sf1	-2.09928	4.61675e-07
Anp32e	-2.68686	4.66538e-07
Abra	-1.28148	5.02162e-07
Hhipl2	-1.04582	5.07682e-07
Trip13	-1.04687	5.083e-07
Syt17	-1.34524	5.2201e-07
Htatsf1	-1.11003	5.36962e-07
Cdh12	-1.11741	5.40025e-07
Rassf2	-2.68191	6.07073e-07
Nedd4	-2.21818	6.12749e-07
Gamt	-2.62425	6.31947e-07
Sowahc	-1.26208	6.64285e-07
AU015836	-2.30891	6.78266e-07
Gm5166	-1.17397	6.91388e-07
Cnksr3	-1.1702	7.06955e-07
Igfbp7	-1.86841	7.82831e-07
Atp1a2	-2.12149	7.89993e-07
Trpc5os	-2.94631	9.14844e-07
Rhoq	-1.09161	9.3841e-07
Ralb	-2.14318	9.39123e-07
1700044K03Rik	-1.23095	9.40279e-07
Aldh8a1	-1.13138	1.00183e-06
Sepp1	-1.7729	1.07667e-06
Stk32c	-1.18091	1.09272e-06
Mageb5	-1.25918	1.19615e-06
Gstm2	-2.19544	1.1991e-06
Lpar3	-2.32936	1.2528e-06
Daam2	-1.27341	1.26042e-06
Fbxo27	-1.31772	1.2814e-06
Comt	-2.01962	1.29761e-06
Itgb5	-1.91717	1.41784e-06
Pcdha1	-1.08588	1.44341e-06
Panx2	-1.11411	1.49005e-06
Gm12108	-1.20622	1.53384e-06
Fxyd6	-1.53537	1.56115e-06
Akr1a1	-1.30361	1.57004e-06
Wipf3	-1.59681	1.6481e-06
Dmrta1	-3.6604	1.74185e-06
Pccb	-1.35147	1.7499e-06
Slc16a1	-1.21514	1.78416e-06
4930401O10Rik	-1.19834	1.81917e-06
P2rx2	-1.12578	1.84997e-06
Scpep1os	-1.06639	1.85196e-06
Med12l	-1.18657	1.92519e-06
Prr13	-1.06633	2.07058e-06
Mtnr1a	-1.29659	2.07194e-06
Sdc4	-2.4297	2.07796e-06
Hpgd	-1.46845	2.08163e-06
Serpina3a	-3.09755	2.14943e-06
Dcc	-1.6478	2.26554e-06
Stim2	-1.206	2.27747e-06
Nenf	-1.60174	2.35698e-06
4930413M19Rik	-1.27429	2.56777e-06
Rpl39	-2.13257	2.63586e-06
Zfp709	-1.75336	2.72193e-06
Cilp	-1.34658	2.82805e-06
Txlnb	-1.1523	2.84799e-06
Bmp8b	-1.4816	2.96073e-06
Rhob	-2.24797	3.07558e-06
Zc2hc1b	-1.19928	3.13975e-06
Sh3d19	-2.56447	3.17387e-06
Tyro3	-2.42946	3.20857e-06
AI414108	-1.38328	3.32733e-06
Hhat	-1.21643	3.39002e-06
Nyx	-1.13146	3.64329e-06
Nradd	-1.02607	3.71209e-06
Litaf	-2.53013	4.45833e-06
Adora3	-1.1009	4.46131e-06
Blnk	-1.28096	4.4616e-06
Cyp26b1	-6.65457	4.47639e-06
Cplx4	-1.11672	4.52109e-06
Taldo1	-1.24034	4.53044e-06
Acp5	-1.16199	4.53906e-06
Gm12709	-1.98526	4.54838e-06
Ctsb	-2.50011	4.58145e-06
Bcat2	-1.40186	4.69552e-06
Tst	-2.63895	4.77637e-06
Cd47	-1.18431	4.7802e-06
Gpx1	-2.01077	4.82538e-06
Smok3a	-1.09723	5.25881e-06
Gm13003	-1.12943	5.63442e-06
Mgarp	-2.53753	5.68407e-06
Ptprn	-1.05065	5.70114e-06
Aldoc	-3.74732	5.71319e-06
Pdk1	-2.45808	6.72685e-06
Enc1	-2.5149	6.91357e-06
Anxa5	-3.34521	7.21839e-06
Mageb3	-1.11106	7.26752e-06
Furin	-3.30827	7.29975e-06
Gpt2	-2.45654	7.42377e-06
Echs1	-1.96792	7.80594e-06
1700011C11Rik	-1.67847	7.85368e-06
Cntn1	-1.15917	7.86424e-06
Eid1	-2.39985	7.90789e-06
Sfxn3	-2.00872	8.14129e-06
Aldh1b1	-2.57737	8.15384e-06
Tspan1	-1.4015	8.21636e-06
Tmem180	-1.06497	8.31438e-06
Ctdsp1	-2.39484	9.13756e-06
Scd1	-2.83211	9.24567e-06
Ddah1	-2.21517	9.79412e-06
Heatr3	-1.28232	1.01541e-05
Drd2	-1.13662	1.04201e-05
Zyx	-2.2105	1.0529e-05
Syt7	-1.50721	1.07424e-05
G6b	-1.03355	1.10581e-05
Mfsd2a	-1.86353	1.12436e-05
4930433B08Rik	-1.71247	1.21701e-05
Hmgb3	-1.23472	1.28998e-05
Gm8369	-1.24417	1.34847e-05
Akr1b8	-1.29243	1.44576e-05
Usp17la	-1.47026	1.46931e-05
Hist1h2aa	-1.39113	1.4949e-05
Lhx4	-2.58845	1.57258e-05
Tmsb15b2	-1.44041	1.68158e-05
Etnk2	-1.95714	1.68194e-05
Myoz3	-1.64709	1.894e-05
Slc22a3	-1.0682	1.93148e-05
Nrep	-1.25222	1.93769e-05
Eng	-1.47013	1.95859e-05
Tspan17	-1.74598	1.98006e-05
4921518K17Rik	-1.16897	1.98879e-05
Tmem176b	-1.53525	2.02977e-05
Wfdc10	-2.62454	2.03067e-05
Dsg1c	-1.54649	2.21375e-05
Trim26	-1.61205	2.30017e-05
Gsta3	-2.65825	2.31229e-05
Adh6-ps1	-2.64896	2.39219e-05
Gcdh	-1.20931	2.39845e-05
Ndrg2	-1.15636	2.49452e-05
Arl8a	-2.46166	2.58597e-05
4930559C10Rik	-1.20674	2.66929e-05
Gm766	-3.12601	2.80712e-05
Xkr9	-1.82074	2.86852e-05
1700024P16Rik	-1.66292	2.87984e-05
Stab1	-1.84537	2.96206e-05
Gm20187	-1.44151	3.00433e-05
Ltbp1	-1.41802	3.01986e-05
Gm11565	-1.74614	3.10638e-05
Fos	-2.29844	3.23891e-05
Satb1	-1.05707	3.29594e-05
E130308A19Rik	-1.009	3.32414e-05
Reep1	-1.13513	3.34299e-05
Ube2e2	-1.10586	3.34386e-05
Galnt1	-2.00258	3.44754e-05
Rras2	-1.48946	3.52887e-05
Chchd10	-1.11908	3.53404e-05
Aldh2	-2.56434	3.58221e-05
Slc25a27	-1.16289	3.64254e-05
Adam10	-1.92286	3.71692e-05
Lypd5	-1.1642	3.72883e-05
Pou2f3	-1.0431	3.92032e-05
Dmrtc1b	-3.12569	3.94329e-05
6330416G13Rik	-1.16482	3.98051e-05
Hfe	-1.27461	4.06469e-05
1700024B18Rik	-1.43745	4.06814e-05
Bex4	-1.86279	4.0723e-05
Uchl1	-1.06159	4.17663e-05
Kitl	-2.82698	4.2266e-05
Wisp1	-1.91034	4.23203e-05
Pdha1	-3.67129	4.35653e-05
Thsd4	-1.04293	4.46657e-05
Nipal1	-1.5011	4.77292e-05
Vcam1	-1.97229	4.89445e-05
Slx1b	-1.08772	4.90209e-05
Gm26705	-1.23049	5.06019e-05
4933416E03Rik	-1.28249	5.07916e-05
Lonrf3	-1.73743	5.09302e-05
Ehd3	-1.29754	5.12376e-05
Lamc2	-1.17493	5.16556e-05
Lactb	-3.85839	5.41798e-05
Lncbate1	-1.00589	5.81227e-05
Ank	-2.35412	5.85562e-05
Tmem55a	-1.28603	6.03987e-05
Fads1	-1.55547	6.60342e-05
Ttc7b	-2.02322	6.92663e-05
Sgce	-1.2679	7.23837e-05
Medag	-1.65717	7.26143e-05
1700092K14Rik	-1.87025	7.36255e-05
Abracl	-1.96454	7.51979e-05
Mgat4b	-1.2763	7.72026e-05
Ubqln2	-2.02331	7.78666e-05
Opcml	-2.31627	7.7878e-05
Frmpd1	-6.3549	8.05992e-05
Vdr	-2.51215	8.0759e-05
Maged2	-1.90192	8.56581e-05
Ces3a	-1.19464	8.67556e-05
Atraid	-2.39305	8.68938e-05
Gm5108	-1.06262	8.75191e-05
Kcnip1	-1.18283	8.80449e-05
Gm10640	-1.63898	8.86716e-05
Cpe	-1.41019	8.92795e-05
Nr5a1	-1.99572	8.96127e-05
Gm3086	-1.10092	9.01953e-05
Etv5	-1.61491	9.11576e-05
Twf2	-2.27521	9.20735e-05
Gm4981	-1.09366	9.30213e-05
Rhbdl2	-1.15309	9.4498e-05
Phyh	-2.1679	9.46699e-05
Crisp4	-1.62162	9.901e-05
Il10rb	-3.2779	0.000100056
Ogdhl	-1.61928	0.000101619
1700018G05Rik	-2.32513	0.000102708
4930550C17Rik	-2.13539	0.000103773
Golm1	-1.59126	0.000105543
Efnb1	-2.11063	0.000106396
Bcl3	-1.30078	0.00010681
A230057D06Rik	-1.23212	0.000107255
Pigh	-1.54508	0.000111667
4930532M18Rik	-1.20719	0.00011206
Mid1ip1	-2.05516	0.000112482
Sod3	-1.70216	0.000113305
Fam210b	-1.57203	0.000113925
Sulf1	-1.19075	0.000114927
Socs1	-1.09444	0.000115583
1190007I07Rik	-1.41978	0.000121951
Rpl10	-1.07966	0.00012447
Gm9112	-2.55614	0.00012736
AU021092	-2.66095	0.000130221
Sult2a7	-2.02113	0.000134863
5330411J11Rik	-1.80997	0.000138908
Acta2	-1.13803	0.000140384
Scd2	-2.41668	0.000143667
Aldh1a1	-2.32441	0.000146524
Stx7	-1.60834	0.000153523
Cdc42se2	-1.22719	0.000159531
Gm6682	-1.15984	0.000159657
4930502E18Rik	-3.17196	0.000165162
Pnp	-1.29294	0.000166503
Ptpn11	-1.06003	0.000176899
Cyfip1	-2.05278	0.0001785
Gm11351	-1.73824	0.000179287
Snx30	-1.77088	0.000181055
Marcks	-2.00182	0.000185556
Sowahd	-3.80909	0.000186303
Tmem37	-1.13658	0.000192408
Fads2	-2.04021	0.000192989
Inhbb	-2.41205	0.000198777
Sohlh1	-1.06466	0.000208237
Chrm1	-1.8469	0.000208736
Mfge8	-1.5828	0.000211638
Slc25a5	-1.05138	0.000214195
4930452N14Rik	-1.98457	0.000221955
Zdhhc2	-1.00778	0.000234382
Timp4	-1.06099	0.000234692
4930487D11Rik	-1.15596	0.000236668
Cd300lg	-1.01271	0.000243019
Insl3	-2.32631	0.000249541
Slc2a1	-1.55419	0.000250669
Hal	-1.0719	0.000252161
Mcoln2	-1.33855	0.000254331
3110015C05Rik	-1.19577	0.000260687
Bhlhb9	-3.15017	0.000262765
Rhox5	-1.95742	0.000269136
Sertad4	-1.22069	0.0002711
Rbbp7	-1.14321	0.000271976
Hoxc9	-1.11211	0.000284793
1700048M11Rik	-1.18383	0.000286067
Nalcn	-1.1638	0.000291934
Ankrd37	-1.07127	0.000292169
Robo3	-1.27188	0.000294567
Chrm5	-1.81495	0.000295253
Zadh2	-2.89577	0.000299329
Gm805	-1.21515	0.000300629
Itih2	-1.57337	0.000301285
Adamts1	-2.32277	0.000307143
Gpm6b	-2.10221	0.000308876
Clstn2	-1.94538	0.000312011
Pip5k1b	-2.19334	0.000318552
Tkt	-1.39476	0.000319018
Hrh2	-1.01667	0.000322458
Tmem35	-2.00704	0.000329406
1700016L21Rik	-1.0361	0.000334945
Sema7a	-1.6869	0.000345337
Wfdc1	-6.07695	0.000349036
Gm16740	-1.42113	0.000354221
Myh9	-1.60308	0.000360244
Crtc3	-1.65433	0.000360621
Colq	-1.10439	0.000363365
Capn1	-1.2644	0.000373629
1700028M03Rik	-1.03585	0.000381392
Ctsd	-2.00155	0.000381721
4930565D16Rik	-1.23014	0.000382894
Parp4	-2.27778	0.000387499
Cacna1b	-1.24055	0.000388633
Gm29811	-2.46654	0.000392595
Pdcl3	-2.71351	0.000397568
1700031F05Rik	-1.52786	0.000410302
Hebp2	-3.52568	0.000424846
Tcn2	-1.80436	0.000428257
Mapkapk3	-1.9447	0.00043274
Wdr76	-1.60547	0.000440684
1700011M02Rik	-2.22711	0.000444353
Gm30498	-1.19307	0.000447696
Elf3	-1.18976	0.000448662
1700039E22Rik	-1.71772	0.000452202
A930001C03Rik	-1.40629	0.000454545
Mxd3	-1.19978	0.000457156
Gstp1	-1.90586	0.000459909
Nt5c3	-1.87911	0.000462523
Fstl5	-1.59739	0.000463436
Syngr2	-2.227	0.000469124
Chrnb4	-1.33857	0.00046945
Rps4x	-2.16021	0.000470984
Acsf2	-1.18754	0.000477687
Sult1e1	-3.16906	0.000480333
Gstm1	-2.18132	0.000492056
Vegfa	-1.60991	0.000508444
Dhrs7	-1.83285	0.000508444
Pglyrp4	-1.1445	0.000516069
Dse	-1.3653	0.00054796
Isoc1	-3.44982	0.000551873
4930546C10Rik	-1.73572	0.000553885
Cited2	-1.86649	0.000559111
Tbx18	-1.79826	0.000559268
Mrpl49	-1.00379	0.000572238
Tgfb1	-2.1909	0.00057286
Tm4sf19	-1.09822	0.000578515
Csf2rb2	-1.01153	0.000580319
Kcnk1	-5.97197	0.000585733
Fam90a1a	-1.08822	0.000593422
Rnase4	-5.97252	0.000598225
Clec12b	-2.65487	0.000600667
Fam196a	-1.01169	0.000612832
Hsd17b3	-2.50411	0.000615013
Tcf7l2	-1.1474	0.000638166
Tcf7l1	-1.12953	0.000653697
4930571O06Rik	-1.60826	0.000655685
Calr4	-1.49083	0.000665573
Txn1	-2.26787	0.000665838
Ephx1	-2.33769	0.00066918
Cntnap4	-1.29279	0.000677826
Rsu1	-3.14464	0.000680601
Kctd14	-2.16065	0.00069209
Slco1a4	-3.66239	0.000696665
Prdx3	-2.02093	0.00070016
Ppp1ca	-1.68485	0.000702947
Tbc1d4	-6.07398	0.00070725
Slc24a3	-1.88776	0.000714062
Serpina3g	-2.51051	0.000731552
Nhlrc2	-1.04328	0.000744937
Zfp395	-2.20625	0.000755152
3632454L22Rik	-2.06121	0.000783055
Odam	-1.64083	0.00078766
Egln3	-1.3356	0.00080254
Ptrf	-2.13789	0.000805799
Abca1	-1.54264	0.000811123
Ptgis	-1.0002	0.000812944
Gm6402	-1.34258	0.000817695
Neurl1b	-1.54295	0.000824192
C1qa	-2.45465	0.000825589
4931420L22Rik	-1.32257	0.000827533
Dab2	-2.59447	0.000865027
Ces1d	-2.06286	0.00086541
Agpat4	-1.82399	0.000874495
Trf	-1.50392	0.000879575
Soga1	-1.5009	0.000898279
Abcd3	-1.35904	0.000904073
Arhgef28	-1.15167	0.000912733
Klhl36	-4.27556	0.000912733
Sema6c	-1.65569	0.000920715
Sbk1	-1.71737	0.000928625
1700019B21Rik	-2.01678	0.000937519
Ttll12	-1.60447	0.000959937
Fgf9	-1.65965	0.000969247
Hist1h2bc	-2.76506	0.000973707
Zfp703	-3.00539	0.00098014
Ebf3	-1.14288	0.000982078
Slc30a2	-1.52656	0.000983061
Pcsk1n	-1.21824	0.00101285
Rassf8	-1.49661	0.00106688
Ube2d1	-3.36711	0.00106697
Tgm7	-1.88436	0.00107478
Egln1	-1.58963	0.00108393
Tnks2	-1.0959	0.00111309
Aass	-2.2252	0.00111622
Lhcgr	-3.26292	0.0011279
Rab3c	-1.18002	0.00112791
Ptgdr2	-1.35685	0.001139
Fez2	-1.85082	0.00114455
Ano3	-1.90977	0.0011483
Ddit4	-1.78335	0.00115197
Cln5	-2.17327	0.00115197
Mesdc1	-4.11416	0.00116363
Timp3	-2.08541	0.00116908
Akap17b	-3.36722	0.00117851
Msrb2	-1.18904	0.00119546
Itgb1	-1.67557	0.00119548
Bmp8a	-1.02822	0.00120303
Acsl4	-2.12037	0.00121784
Gm4566	-1.22289	0.0012376
Cyp4f13	-2.06035	0.00125265
Klf6	-1.54658	0.00125503
Psat1	-1.31478	0.00129551
Fgfr2	-1.50739	0.00133303
Plcb1	-1.05321	0.0013773
Gadd45g	-1.04805	0.00142492
Rab12	-1.82258	0.00143329
Alas2	-1.86341	0.00143411
Tpmt	-1.78109	0.00145439
Car5b	-1.19856	0.00146525
Gm11166	-1.12924	0.00146847
Id2	-1.50708	0.00147156
Gpc6	-1.04918	0.00148581
Prkce	-1.72143	0.00149809
Nhlh2	-1.37714	0.00150674
4930598F16Rik	-1.33525	0.00152989
Slitrk2	-1.20718	0.00156925
Gins3	-1.07545	0.00158893
6030408B16Rik	-4.0217	0.0016136
G6bos	-1.48029	0.00162011
Gm29766	-3.28773	0.00162936
Gcm1	-1.39448	0.00165446
Susd3	-1.44705	0.00167858
Atp1a1	-1.45662	0.00168241
Cyp17a1	-2.33789	0.00170029
Mfsd1	-1.09732	0.00171839
A330049N07Rik	-1.26055	0.00173281
Fam120a	-1.05746	0.00174553
4930515L03Rik	-2.14535	0.00176282
4921509O07Rik	-1.55699	0.00176408
Smim10l2a	-2.11927	0.00178596
Figla	-1.44999	0.00180224
Lrp1	-1.39686	0.00181501
Sardh	-1.4227	0.0018246
Rgs2	-2.82788	0.00188241
Enpp5	-1.78386	0.00195507
Clec18a	-1.36867	0.00201624
Mir3064	-1.10503	0.00201851
B2m	-1.21282	0.00204038
Gm12128	-1.08831	0.00205284
Tsku	-2.63866	0.00208959
Gda	-2.62301	0.0020949
Pnpo	-1.08543	0.00209549
Zbtb14	-1.05898	0.00209701
Mgst1	-2.4245	0.00218809
Ptgds	-2.41429	0.00220643
Slc7a8	-2.05828	0.00220838
Magt1	-1.00562	0.00221784
Fam19a2	-1.06412	0.00222245
B630019K06Rik	-2.46373	0.00223692
D16Ertd519e	-1.719	0.00223992
Glrx	-3.27919	0.00231428
Hacd4	-1.85028	0.00233258
Fhl1	-1.70577	0.00233776
Igf2r	-1.21532	0.00235738
Zfp119b	-1.23163	0.00237862
Kank1	-1.07986	0.00244392
Frem2	-1.01006	0.00244434
Gm20139	-1.59844	0.00244834
Hmgcl	-1.03287	0.00245921
Lrp10	-1.8208	0.00257702
Vstm4	-1.29892	0.0026146
Tmem14c	-1.25994	0.00265722
Tmem255a	-1.26533	0.00269458
Pfkl	-1.26668	0.00272729
Sparcl1	-1.11609	0.00276302
Lcn11	-3.92096	0.00283544
Pus7	-1.84944	0.00284116
Frrs1l	-1.00302	0.00294898
Prg2	-1.38847	0.00295572
Chp2	-2.56576	0.00298708
Arhgap31	-1.04067	0.00301504
Slc44a1	-1.37806	0.00304815
Sema3c	-3.92431	0.00311994
Atp6ap1	-1.92528	0.00315056
Mpv17l2	-2.40625	0.00315254
Pcp4l1	-3.00017	0.00315831
Acsbg1	-2.28278	0.00316551
Dzip1l	-1.58346	0.0031756
Abca8a	-1.10379	0.00327934
Gm4980	-1.77815	0.00329268
Gm6213	-5.73569	0.00329489
Qpct	-1.44755	0.00336779
Pls3	-2.0083	0.00339238
Axl	-1.26174	0.00345835
Mllt6	-2.10838	0.00350194
Grb2	-1.31994	0.00352421
Hsd3b1	-2.49031	0.00360562
Cyp4f16	-1.63345	0.00366447
Csf1	-2.01188	0.00369655
Ddx19a	-1.08206	0.00370988
Susd1	-1.63419	0.00375552
Agfg2	-1.70293	0.00377732
Fam3c	-2.13667	0.00380591
Cd274	-1.41365	0.00386611
Klrg2	-1.18256	0.00387502
4933436E23Rik	-1.56697	0.00391211
Clic6	-1.86318	0.00392804
4930419G24Rik	-1.16254	0.00396539
Rcn1	-2.9893	0.00396799
Vkorc1	-2.9893	0.0039691
Adamts12	-1.44746	0.00403141
Snx12	-2.84421	0.00406188
Pex26	-2.1714	0.00408579
Fbxl6	-2.54647	0.00408579
Papss2	-1.35534	0.00412064
Mospd2	-3.91898	0.00415929
Spin1	-1.09559	0.00420936
Folr1	-2.01244	0.00423305
Lcn2	-2.07181	0.00427566
Rdh18-ps	-1.37551	0.00429327
8030411F24Rik	-2.99023	0.00431718
Gprasp2	-2.54702	0.00434557
Tmem114	-1.30503	0.00438891
Ntng1	-1.64534	0.00440148
Gm4719	-1.10738	0.00446553
Col11a1	-1.01361	0.00448893
Copz2	-2.75969	0.0045176
Iigp1	-2.39228	0.00452036
Tmem176a	-1.90748	0.00453683
Nampt	-1.12484	0.00460096
Gm648	-2.3211	0.00470286
Zfyve21	-2.3211	0.00470363
Kcnt1	-1.5674	0.00474205
Tspan15	-1.3056	0.00476196
Slc35b2	-1.62112	0.0047732
Cd163	-1.38123	0.00485652
Slc7a13	-2.54681	0.00489541
Rbp1	-1.27425	0.00496611
Defb45	-2.62014	0.00500893
Gm7325	-2.54785	0.00510413
Pank3	-1.41873	0.00512176
1600014C23Rik	-1.35553	0.00512176
Pygb	-1.6444	0.00515829
Ctnnal1	-1.63193	0.00517581
Ccr2	-2.01977	0.00520285
Irgm2	-1.86485	0.00531302
Krt23	-1.22707	0.0053351
Psen2	-1.94544	0.00542585
Sox12	-1.75928	0.00544324
Mlph	-1.04013	0.00544909
Pcmtd1	-1.72233	0.00548967
Cmbl	-2.28106	0.00561886
Ddah2	-1.06849	0.00564757
Gm8773	-1.94669	0.00573578
S1pr1	-1.44761	0.00582575
Tmem160	-5.59996	0.00591929
Grhpr	-1.61995	0.00592506
Gm17660	-1.11913	0.00594684
Bik	-2.31975	0.00597758
Sec24d	-2.31975	0.00597758
Klk1b24	-3.1841	0.00601465
Ctdspl	-1.58798	0.00606603
Upk1b	-1.4043	0.00607375
Pkdcc	-2.09128	0.00611587
Nos2	-1.16491	0.0061745
Adh1	-1.89169	0.00618898
Hsd17b10	-2.4589	0.00619287
2310020H05Rik	-1.97056	0.00625051
Bax	-2.32054	0.00628123
9230104L09Rik	-2.27764	0.00628123
Lrig3	-1.48653	0.0064015
Tbc1d8	-1.58669	0.00642193
Pon3	-2.21266	0.00647467
Fgf18	-1.13971	0.00647841
Cav1	-1.59649	0.00660922
Smpd1	-1.72956	0.00661024
Fndc5	-1.03937	0.00667313
Mnx1	-1.25176	0.00668909
Kremen2	-1.01186	0.00669278
Dcn	-2.87476	0.00672231
Elavl2	-1.53439	0.00673954
Ids	-2.92092	0.00675535
Txndc5	-2.0404	0.00678312
Btbd3	-1.25126	0.00680162
Slc10a6	-1.34146	0.00686928
4930591E09Rik	-2.67065	0.0069091
Armc7	-2.87612	0.00692621
Casp3	-2.87645	0.00692621
Cnga1	-1.26059	0.00692864
1700024I08Rik	-1.28711	0.00700533
Bpifa1	-1.24364	0.00712006
Diras2	-2.46395	0.00718559
Pgbd5	-1.46489	0.00719483
Satb2	-1.00194	0.00727868
Olfr301	-1.22043	0.00736232
Stx4a	-2.14468	0.00740056
Tprkb	-1.20936	0.00740106
C130074G19Rik	-1.6632	0.00752996
Rgs5	-2.87391	0.0075885
Hsd3b6	-1.91363	0.00761742
Gata4	-2.10704	0.00764241
Ehmt1	-1.48685	0.00765716
Primpol	-1.93227	0.0078195
Fabp7	-1.94748	0.00784025
Kank2	-1.36927	0.00784924
Fcgrt	-2.21422	0.00785292
Ptpn3	-1.64775	0.00791079
Emp1	-2.84052	0.0079788
Gm6815	-1.14773	0.0081854
Sh3bgrl	-1.66931	0.00832053
Blvrb	-2.46353	0.00834525
Prps2	-1.29063	0.00840502
Pcdhb4	-1.10414	0.0084822
Gja1	-1.89933	0.00851804
9330159F19Rik	-1.58235	0.00852604
Ndrg1	-2.24487	0.00855297
Ajuba	-1.44514	0.00861009
Hprt	-3.35587	0.00867775
Ninj1	-2.52199	0.00869898
Armcx4	-1.53322	0.00881438
Cyp2j13	-1.4889	0.0088753
Ldb2	-2.57093	0.00888431
Vps26b	-1.06469	0.0089256
Leprot	-1.44449	0.00915387
Hmgcs2	-2.13251	0.00924367
Pramel7	-1.44507	0.00934196
Armcx2	-2.75522	0.00971657
Defb15	-1.06486	0.00974877
A430088P11Rik	-1.05299	0.00980685
Lsr	-1.03951	0.00996197
Slc35f2	-2.3781	0.0101236
St8sia2	-2.14263	0.0101378
Cd36	-1.18239	0.0102828
C1rl	-2.37792	0.0105572
Hsd17b11	-1.30549	0.0106161
Oxtr	-2.05515	0.0106645
Hes2	-1.16096	0.0106938
Asah1	-1.16439	0.0107679
Trim12c	-1.07997	0.0109283
Rasd1	-2.24359	0.0109818
Creb3l1	-1.82281	0.0110772
Lama3	-1.44296	0.0111602
Atf3	-2.21006	0.0112469
Laptm5	-1.27554	0.0113135
Gata1	-1.00163	0.0113198
Amot	-1.78081	0.0116525
Gm15401	-1.06565	0.0116998
Rnf135	-2.87092	0.0117106
Nxnl2	-2.87171	0.0117124
Gbp9	-2.87091	0.0117133
Tshz1	-1.37138	0.0117741
Arhgap32	-1.08262	0.0119511
Trmt2b	-2.37829	0.011963
Adgra1	-1.45384	0.0120546
S100a1	-2.66441	0.0121838
Wfdc6a	-2.24288	0.0121952
Akr1cl	-2.22827	0.0122092
Mrgpra2b	-1.78234	0.0122215
Pkn1	-1.02746	0.0122733
Ccrl2	-1.08843	0.0122795
Cdkn1b	-2.24458	0.0122884
Adamtsl3	-1.06447	0.0122958
Wnt6	-1.16147	0.0124155
Plagl1	-2.57328	0.0124351
Slc48a1	-1.87807	0.0127506
Prlr	-1.23818	0.0127632
Fabp3	-1.41731	0.0127686
Slc52a3	-1.21071	0.0128163
Star	-1.86618	0.0130461
Resp18	-1.81442	0.0131979
Srl	-1.95051	0.0133089
Arhgap18	-1.95051	0.0133172
Pycrl	-2.46953	0.013416
Enpp2	-2.06989	0.0134628
Gli2	-1.08196	0.0135146
Lyz1	-2.46597	0.0135643
Bok	-2.67443	0.013951
Trim47	-2.06964	0.0140791
Tab3	-1.2563	0.0141611
Cd209f	-1.78232	0.0142484
Hoxd9	-2.37597	0.0143826
Stx1a	-2.46526	0.0146818
St6gal1	-1.8944	0.0148127
Sp100	-1.71822	0.0148408
Tsr2	-1.48916	0.0148891
Msrb1	-2.24191	0.014921
Tigit	-1.01462	0.0151308
Klf3	-1.18699	0.0151919
4933433G19Rik	-1.04554	0.0153753
Gm1045	-1.20824	0.0154195
Mrc1	-1.22258	0.0154791
Jkamp	-2.28703	0.0155325
AA414768	-2.00218	0.0156345
Eci2	-1.53762	0.0160526
Scamp3	-2.28692	0.0161108
Mro	-1.00118	0.0161259
Palmd	-1.2334	0.016159
Gm11548	-2.16236	0.016159
Hddc2	-1.06552	0.0163301
4930448F12Rik	-1.00462	0.016373
Gm4926	-1.14369	0.0164
Bhmt	-2.0769	0.0164528
Rp1l1	-1.71852	0.0164768
Olfr308	-1.78443	0.0164892
Smox	-1.44188	0.0165488
Spon1	-1.03859	0.0166794
Gm5294	-1.44731	0.0167022
Tmprss11a	-2.46799	0.0169256
Rnf149	-1.26588	0.0169531
2410021H03Rik	-1.86027	0.0170691
Usp27x	-3.58012	0.0172802
Tspan14	-1.04058	0.01732
Pnma5	-3.58084	0.0174617
Cidea	-3.58084	0.0174653
Cldn23	-1.66203	0.017528
Sfxn1	-1.21183	0.017731
Rcan2	-1.74537	0.0177852
Timd2	-5.28607	0.0179728
Alx4	-1.14455	0.0179846
A730017C20Rik	-2.06867	0.0179985
Fkbp9	-1.48931	0.0181944
Ostm1	-2.75122	0.0185172
Usp22	-1.32028	0.0188149
L1td1	-2.67813	0.0188598
Zeb2	-2.00122	0.0189049
Pgm1	-1.26568	0.0189862
Lrrc4c	-1.07478	0.019245
Prl7c1	-2.1635	0.0193368
Tesc	-1.09979	0.0193531
9830166K06Rik	-2.46921	0.0194193
1500009L16Rik	-1.14647	0.0195216
4930528G23Rik	-1.10534	0.0195216
Zcchc18	-3.5819	0.0197251
1700022H16Rik	-2.16081	0.0197443
Ly75	-1.3209	0.0199404
Fabp5	-2.28438	0.0204178
Gsta2	-4.09435	0.0205675
Zbtb12	-1.00211	0.0206524
H6pd	-1.13028	0.0206676
Lynx1	-1.74412	0.0209268
Pcdhb13	-1.21369	0.0210455
Cpt1a	-1.10094	0.0210716
Cpa3	-1.55298	0.0214876
Tmem164	-1.44071	0.0215278
9430038I01Rik	-2.35208	0.0219901
Gipc3	-2.35208	0.0219901
Fcgr2b	-1.00031	0.022033
Pstpip2	-1.0011	0.022033
Gpr6	-2.28903	0.0220335
Tmem135	-1.39363	0.0223094
Serpina3c	-1.82481	0.0225436
Slc45a3	-2.00263	0.0226412
Ets1	-1.92928	0.0227383
Rhpn2	-1.63319	0.022869
Lgmn	-1.03764	0.0229591
Gyg	-1.99564	0.023014
Olfr1413	-1.14542	0.0233876
Emcn	-5.28319	0.0234114
Tigd3	-1.99434	0.023504
Rock2	-1.73501	0.0239309
5730409E04Rik	-2.2847	0.0241244
Lgals9	-3.57721	0.0241442
Ammecr1	-3.57755	0.0241499
Klhdc8a	-2.28356	0.0241641
Bst2	-1.74825	0.0244854
Rarres1	-1.69608	0.0245381
Hspb8	-1.35153	0.0246318
Aifm1	-1.8587	0.0247151
Glmp	-1.69161	0.0247699
Lhfp	-2.18789	0.0249107
Fundc1	-2.18789	0.0249107
Agt	-2.38435	0.0250249
Pcyt1b	-2.3512	0.0250605
Wdr45	-2.351	0.0250822
Zxda	-1.6511	0.0252129
Ccdc120	-1.3439	0.0252797
Mpeg1	-1.83554	0.0253785
Ces4a	-1.49725	0.0255787
Gpr50	-1.21299	0.0258635
Cyp11a1	-1.90208	0.0260823
Tspan8	-1.34406	0.0263183
Gstk1	-2.06059	0.0263802
Hoxd11	-2.35477	0.0265386
Apba2	-2.35477	0.0265531
Asah2	-1.56042	0.026763
Ctsc	-1.15046	0.0267999
Mocs1	-1.99296	0.026961
5033403H07Rik	-2.07676	0.027035
Ttc13	-1.85711	0.0270863
Trim7	-1.15112	0.0270869
Atg16l1	-1.56158	0.0270961
Map6d1	-1.19868	0.0271852
Tns2	-1.10804	0.0277063
44447	-1.58013	0.0279146
Osbpl5	-2.1869	0.0279768
Snx7	-1.67488	0.0282933
Idh2	-1.43968	0.0283391
Bgn	-3.4456	0.0284959
Myc	-3.44573	0.0284972
Mir1249	-2.18912	0.0288713
Serpina9	-1.10341	0.0293524
Rsad2	-3.44508	0.02961
Ugdh	-2.35549	0.0296369
Mir6958	-1.56217	0.0297181
Npl	-1.39207	0.0298693
Gm20172	-1.58198	0.0299373
Nrp1	-1.44119	0.0300603
Rorb	-1.57046	0.0302566
Arl5a	-1.99251	0.0302586
Grm7	-1.01325	0.0303344
Ikbip	-1.58152	0.0304337
Rab3b	-1.49532	0.0306238
Arxes2	-2.61846	0.0306306
Ier2	-2.1807	0.0308378
Gm14374	-1.13784	0.0308444
Uba3	-1.18786	0.0309209
Hif1a	-1.00173	0.0310519
Cbx6	-2.07773	0.0310725
Cldn14	-1.1773	0.0317596
Lyplal1	-1.55933	0.0317853
Rnf217	-5.09836	0.0321771
F730035M05Rik	-1.27532	0.0322731
Fcrls	-5.09905	0.0324049
Hlf	-5.09905	0.0324068
Fundc2	-2.07355	0.0327327
Gm10371	-1.02377	0.0328076
Cyp4f40	-1.05749	0.0329702
Skint9	-1.22715	0.0331634
1810064F22Rik	-1.5959	0.0331863
Ece1	-1.28885	0.0333417
Tmem132a	-1.67003	0.0335403
Tubgcp5	-1.67003	0.0335443
N4bp2l1	-1.59653	0.0335459
Olfr62	-1.58327	0.0340173
8030423F21Rik	-1.91261	0.0341415
Tnfrsf1a	-1.19448	0.0342671
Lhfpl2	-1.27534	0.0343484
Lppr5	-1.91311	0.0344947
Tnn	-1.91311	0.0344947
Wnt5a	-3.44364	0.0347166
Arl4d	-2.15711	0.0350142
Cox15	-1.43972	0.0353615
Cyp3a57	-1.26582	0.0354705
Kcnj13	-1.82288	0.0354791
B630005N14Rik	-1.98424	0.0356063
H2-T3	-1.98412	0.0356063
St3gal3	-1.29626	0.0357621
Apln	-2.60503	0.0357976
Asic2	-1.14568	0.0358336
Slc22a17	-2.07292	0.0362408
Slc25a45	-1.65235	0.0363206
Fam83f	-1.30377	0.0363234
Echdc3	-5.09691	0.0364019
Klhdc7a	-1.59467	0.0365131
Myh2	-2.08294	0.0369299
Cd200	-1.91185	0.0369824
Sox8	-1.91376	0.0370566
Hbegf	-2.27985	0.037086
Ecm2	-1.13138	0.0371782
Ptch1	-2.23058	0.0374161
Amigo2	-2.23058	0.0374203
Vma21	-1.02196	0.0374382
Hgsnat	-1.13542	0.037745
1700085C21Rik	-1.20022	0.0379809
Zfp92	-1.12037	0.0380374
Msx3	-2.19215	0.0381001
Bckdk	-1.09284	0.0381202
Bnc1	-1.25304	0.0381892
Vnn3	-1.30425	0.0383256
Sfxn2	-1.14852	0.0386251
Itgb6	-1.49908	0.0387597
Gm10549	-1.98536	0.0387801
Psme1	-1.27443	0.0389988
Selenbp1	-1.99033	0.0392516
Trub1	-1.09217	0.0393463
C1qc	-1.57967	0.0395957
Zfhx2os	-1.29536	0.0396162
Nid1	-1.13888	0.0404908
1700001D01Rik	-1.07288	0.0407045
Uox	-2.08439	0.0407375
AU023762	-1.00758	0.0409197
2210016L21Rik	-1.70328	0.0411948
Xiap	-1.71173	0.0414574
Adgrf5	-1.00164	0.0418065
Bag2	-1.56122	0.0419485
Smtn	-1.06974	0.0424198
Necab1	-1.03683	0.0427533
Msmo1	-1.19785	0.0430526
Brms1l	-1.50366	0.0431412
Olfr23	-1.10163	0.0431436
Igfbp2	-2.36788	0.0437194
F11r	-1.63921	0.0441814
Ebp	-1.49832	0.0444779
Jtb	-1.11161	0.0447546
Igfbp6	-1.80655	0.0448088
Bmp4	-1.50891	0.0448514
4833427F10Rik	-1.28116	0.0450642
Plxdc2	-1.09652	0.0452307
Htra3	-1.26604	0.0454171
Il22	-1.98662	0.0457578
Zbtb33	-2.46848	0.0467012
Fgf15	-2.08113	0.0467059
Cox7b	-1.21286	0.0468429
Slc12a9	-2.46908	0.0470175
1600014C10Rik	-3.2972	0.0471116
Tmed9	-1.25087	0.0471816
Acads	-1.23743	0.0473205
Tcf3	-1.59383	0.0476239
Lrrc14b	-1.09136	0.047822
Efna5	-1.04035	0.0479428
Lefty2	-1.07878	0.048047
Gm14461	-1.16394	0.0486355
Sgk1	-2.23444	0.0489758
Hmox1	-2.30719	0.0491878
Ngfrap1	-1.038	0.0496391

## Sheet: spermatogonia_up
Supplementary file 4. (E) List of up-regulated genes in spermatogonia (log2-fold-change > 1, FDR < 0.05).
Gene symbol	logFC	FDR
Zan	3.6046	9.47871e-06
Dnah8	1.78278	9.47871e-06
Tdrd6	2.14244	3.29478e-05
Ccdc108	2.31455	6.41369e-05
Dnah17	1.85075	0.000258115
Kctd19	2.02655	0.000802035
Piwil1	1.88478	0.000802035
Ccdc60	1.93537	0.000802035
Toporsl	2.48638	0.000802035
Cfap45	2.18534	0.00288503
C2cd4b	4.40256	0.00341818
Morc2b	1.93707	0.00477253
Myh15	3.07467	0.00543692
Mroh4	1.66395	0.00750658
Gm5878	3.02109	0.00750658
Gm17026	3.59619	0.00754145
Pom121l2	1.92806	0.00754145
Fbp1	1.9122	0.00754145
Slco6c1	2.32779	0.00837694
Iqub	2.11048	0.0104406
4921504E06Rik	2.62939	0.0120676
1700028P14Rik	2.10493	0.0162485
44266	1.78601	0.0172964
Slc13a5	2.34647	0.0177852
Adam2	1.7247	0.0188043
Ccdc39	1.88875	0.0197941
Dnah6	1.88774	0.0197941
Dyrk3	1.88775	0.0203897
Tekt4	1.99938	0.0203897
Lrrc34	2.17778	0.0203897
Hspa2	1.19941	0.0204185
Fam181a	2.90872	0.0204185
Zmynd10	1.74788	0.0204185
Ccdc13	2.0415	0.0204185
Tmem63c	2.65837	0.0204185
Maats1	2.1814	0.0225733
Arhgap33os	2.89363	0.024319
Ccdc65	1.84498	0.0244708
Ccdc113	1.89653	0.0244708
Fam186b	1.92332	0.0244708
4930444F02Rik	2.40084	0.0272792
Gk2	1.57677	0.0272792
Spag6	1.74738	0.0272792
4932414J04Rik	3.93594	0.0294568
Speer1	2.70364	0.0298836
4932416K20Rik	3.51214	0.0328883
BC027072	4.55005	0.0328883
Efhb	2.00007	0.0362631
Cfap53	2.00832	0.0363331
Lrriq4	2.27211	0.0372295
Slc2a3	1.14421	0.0372295
Abcc12	1.80466	0.0372295
1700010I14Rik	1.52392	0.0372295
Cfap58	1.87431	0.0400894
Acr	1.81169	0.0406346
Slc9c1	1.94723	0.0415403
Iqca	2.98593	0.0431533
Gp5	6.50336	0.0431533
Hdgfl1	1.8841	0.0431533
Ccdc42	1.89523	0.0441988
Ccdc146	2.16871	0.0458847
Ropn1l	1.32405	0.0460131
Ccdc89	1.78002	0.0478295
Dnmt3l	3.48165	0.0478295
Ccdc81	1.80442	0.0492032

## Sheet: spermatocyte_up
Supplementary file 4. (F) List of up-regulated genes in spermatocyte (log2-fold-change > 1, FDR < 0.05).
Gene symbol	logFC	FDR
Ccdc108	2.33476	2.27576e-05
Dnah17	1.97931	8.98486e-05
Gm6639	3.60002	8.98486e-05
4930525D18Rik	3.14534	0.000457063
Piwil1	2.22191	0.000464567
Cfap46	2.2795	0.000468631
Mroh4	2.04936	0.000474392
1700042G15Rik	2.58295	0.000474392
Elfn2	2.43548	0.000648842
Dnah8	1.81379	0.000648842
Zmynd10	1.93464	0.000648842
4930444F02Rik	2.4071	0.000648842
Tdrd6	2.016	0.000648842
Zfp820	2.43185	0.000648842
Adam2	1.84461	0.000648842
Lrrc71	2.09587	0.000750268
Stambp	1.86134	0.000750268
Poteg	2.518	0.000779845
Mapk15	2.35943	0.000781938
Ccdc39	1.83747	0.000781938
Dnah1	1.67833	0.00104413
Smpd5	1.9546	0.00104413
Mroh2a	1.85806	0.00117103
Slc2a3	1.89084	0.00169805
Cfap74	1.84296	0.00172941
Catsperb	2.33894	0.00172941
1700010I14Rik	1.67464	0.0019868
Catsperg1	1.57186	0.00232475
Gm21284	2.25753	0.00232475
4921525O09Rik	2.36256	0.0024982
Rsph1	1.32982	0.0024982
Catsperg2	1.84074	0.00255768
Ldhc	1.56695	0.00255768
4930463O16Rik	2.22016	0.00283019
Ptchd3	1.97152	0.00292363
Aym1	2.9993	0.00292363
Gm5878	2.74327	0.00292363
Ccdc60	1.71379	0.00292363
Ankrd36	1.67054	0.00315989
1700006A11Rik	1.84539	0.00315989
Ybx2	1.13704	0.00315989
Cfap70	1.95745	0.00404136
Odf4	1.82057	0.00416857
Lrrc23	2.13816	0.00422516
Trafd1	1.14711	0.00422516
Mapkbp1	1.04412	0.00422516
C530008M17Rik	1.45486	0.00428349
Speer1	2.38808	0.00428349
Kctd19	1.2403	0.00470476
4933440M02Rik	2.37436	0.00470476
BC049730	1.67942	0.00470476
Mgat4d	2.10934	0.00470476
Kcnk10	2.82386	0.00470476
Cul9	1.0097	0.00470476
Hydin	1.73417	0.00473717
Ggnbp1	1.50116	0.00480035
Tmem30c	2.2638	0.00493233
Drc7	2.17351	0.00493233
Gstt2	1.79735	0.00496307
Spag6	1.81818	0.00513274
Cchcr1	1.02622	0.00531148
Dnah7b	1.65164	0.00534478
Gm6567	2.65028	0.00534478
Tkfc	1.25873	0.00534478
Als2cr12	1.95576	0.00534478
Morc2b	1.78232	0.00534478
Gm21269	2.50762	0.00534478
Adam32	1.47704	0.00534478
Dnah7a	1.61296	0.00546292
Ccdc13	1.67558	0.00546292
Pcsk4	1.39765	0.00597348
Ccdc180	2.09386	0.00597827
Hspa2	1.18402	0.00597827
Fam181a	2.29876	0.00597827
Mak	1.44979	0.00597827
Ldhal6b	1.62992	0.00603462
1700102P08Rik	1.36853	0.00614397
Abcc12	2.12147	0.00614397
Ift172	1.0673	0.00614397
Cdc42ep3	1.68797	0.00621822
Ahdc1	1.32546	0.0064182
Fras1	1.69501	0.00643025
Gk2	1.55475	0.00643025
Fam186b	1.64988	0.00645945
Pbx4	1.39714	0.00663021
Tcam1	1.23638	0.00663021
Ttll6	1.6468	0.00666881
Tmbim7	1.87882	0.00666881
Dnah2	1.06685	0.0068535
Rfx2	1.16372	0.0070342
Rnf32	1.34814	0.00707175
Id4	1.82396	0.00707175
Ccdc38	1.52881	0.00730806
4931408D14Rik	2.06863	0.00744501
1700029M20Rik	1.4758	0.00751896
BC027072	2.65439	0.00765171
Slc8a2	1.45431	0.00765171
Rfx4	1.94469	0.00768471
4930470H14Rik	1.19567	0.00768471
Cntd1	1.23207	0.00777868
Gm21221	2.38744	0.00777868
Zfp608	1.84714	0.00791801
Pkmyt1	1.30198	0.00803515
1700008K24Rik	1.63079	0.00803515
Glb1l	1.21574	0.00813757
Cox6b2	1.21628	0.00819628
Smim24	1.25045	0.00863284
Dnah6	2.10691	0.00898609
Fbp1	1.63504	0.00905571
Ndufaf3	1.20236	0.00912964
9330102E08Rik	1.19113	0.00934862
4932414N04Rik	1.98452	0.00934862
Spag17	1.61584	0.009372
Mir7232	2.88733	0.00967616
Wdr93	1.34849	0.0106795
Arhgef25	1.08502	0.0107033
Scgb2b23-ps	2.07267	0.0107241
Pbp2	1.86486	0.0109241
1700020N18Rik	2.27361	0.0109241
Tekt1	1.47469	0.0114168
Dlec1	1.68319	0.0114168
Cfap43	1.40715	0.011496
Ropn1l	1.32133	0.0115557
Pdcl2	1.39163	0.0115557
Dnaaf1	1.1257	0.0115557
Tesk1	1.02388	0.0115557
Cers3	1.43841	0.0115557
Pomt1	1.05474	0.0115557
44266	1.60274	0.0115557
Tcea2	1.02505	0.0115557
Wdr63	1.89862	0.0115557
Dis3l	1.23867	0.011776
Abhd8	1.15416	0.011776
Rbakdn	1.69165	0.0117877
Eid3	1.48171	0.0119979
Agbl5	1.04188	0.0120894
Setd1b	1.27665	0.0122148
Trim11	1.19634	0.0128628
Tctn1	1.11821	0.0129096
4933404O12Rik	1.40496	0.013425
Fabp9	1.22196	0.013629
Pde1c	1.47235	0.0140505
Tktl2	1.16677	0.0140505
Slc47a2	1.84796	0.0140505
1700029P11Rik	1.42163	0.0144776
Ttll13	1.1502	0.0144776
Dpy19l2	1.6719	0.0144776
Rab11fip5	1.00469	0.0146123
1700003M02Rik	1.49343	0.0146123
Mib2	1.1547	0.0146123
Qrich2	1.36474	0.0151198
Chst1	1.88246	0.0151198
Clgn	1.17149	0.0152766
Fam228a	1.40411	0.0155926
Uggt2	1.08041	0.0165928
Ypel1	1.20778	0.0165928
1700026D11Rik	2.6841	0.0168865
1700010B08Rik	1.77827	0.0168865
Mroh2b	1.35395	0.0171459
Cox8c	1.46921	0.0171521
Pom121l2	1.61848	0.0173095
Col16a1	1.29856	0.0173381
4933433G15Rik	1.34909	0.0173381
Pdha2	1.13666	0.0175619
Smco2	1.76973	0.0175619
Mlc1	1.05706	0.0176495
Daw1	2.24673	0.0176495
Gm2762	1.71501	0.0176495
1700011I03Rik	1.76685	0.0182019
Sprtn	1.05335	0.0182019
Pabpc6	1.33103	0.0182019
Dkkl1	1.36069	0.0182019
Agbl2	1.36859	0.0182019
Mdh1b	1.67863	0.0182019
Lrrc61	1.63929	0.0184212
Hdgfl1	1.43411	0.018493
Ptpn20	1.17705	0.0187801
Lca5l	1.34966	0.0190029
Izumo4	1.37653	0.0194612
Ldha	1.27798	0.0201247
Arl3	1.01724	0.0201247
Mir7223	3.67181	0.0201247
44265	1.13927	0.0201247
Atp8b3	1.09821	0.0201247
Abhd14a	1.29276	0.0201247
Gm1527	2.59483	0.0207961
Nol4l	1.0691	0.0207961
Pnmal1	1.75095	0.0207961
Ccdc65	1.59342	0.0210636
Cfap52	1.69672	0.0210636
1700001J11Rik	1.29262	0.0210636
Iqcd	1.55928	0.0210636
D130017N08Rik	1.9644	0.0210636
Art3	1.30947	0.0210636
4931419H13Rik	2.61588	0.0213007
Kif4-ps	1.97489	0.021323
Prps1l1	1.64621	0.0216628
6430531B16Rik	1.58416	0.0216628
Hsf5	1.14698	0.0216628
4930442J19Rik	1.64572	0.0216839
Ankmy1	2.01828	0.0222112
Tdrd5	1.09018	0.0223195
4933409G03Rik	1.49908	0.0229369
4933427E11Rik	1.7417	0.0233645
Gm4763	1.54486	0.023375
Slc13a5	2.01953	0.0236093
1700012B09Rik	1.61063	0.0239772
Prok2	1.73564	0.0242952
Slc2a5	1.31676	0.0243498
Dcdc2a	1.85063	0.0249829
Efhc1	1.33866	0.0255705
Ccdc144b	2.06823	0.0260777
Gm15881	1.62503	0.0265603
Abca16	1.22368	0.0280419
Rhpn1	1.15086	0.028107
Gm17359	1.75785	0.0284108
Fank1	1.26113	0.0284108
Spdye4b	1.47429	0.0284108
1700040L02Rik	1.50698	0.0286565
Psma8	1.10691	0.0287824
Fam184a	1.29268	0.0290566
Arhgap33os	1.37449	0.0290566
Meig1	1.13155	0.0290566
Gtf2a1l	1.49532	0.0294253
Gm10619	2.69475	0.029612
1700009C05Rik	2.15488	0.0297711
Csl	1.64669	0.0300298
Mpi	1.06235	0.0303078
Pnma1	1.489	0.0303922
Slamf7	1.9876	0.0303922
Nup210l	1.10563	0.0303999
Rp1	3.00574	0.0304466
D130043K22Rik	1.5665	0.0312307
Nsun7	1.25256	0.0315339
Cfap69	1.09096	0.0315339
Prss43	1.81032	0.0329982
Fam188b	1.33399	0.0335389
Spata4	1.19006	0.0335389
Ak7	1.43808	0.0343726
Ankrd45	1.30085	0.0347084
Gm128	1.21872	0.0354693
Lrriq1	1.60512	0.0354693
Stkld1	1.33455	0.0355261
Pde10a	1.6811	0.0356422
D830026I12Rik	4.00949	0.0359756
Fam50b	1.5311	0.0359756
Dnaic1	1.31385	0.0359756
Tgif1	1.23856	0.0359756
Ttc30a1	1.32357	0.0359756
Dynlrb2	1.82133	0.0359756
Fbxw10	1.2661	0.036195
Capn11	1.52073	0.0364342
Lypd4	1.20555	0.0364342
Fhad1	1.16172	0.0365635
Cyct	1.28149	0.0370919
Hmga2	1.6117	0.0379027
Mag	1.31303	0.0385891
Oscp1	1.10025	0.0386986
Adgb	1.56341	0.0386986
Samd7	1.86744	0.0390019
Tekt3	1.49131	0.0396066
Arsa	1.38873	0.0398512
1700019A02Rik	1.3658	0.0405356
Alx1	1.31177	0.0406912
Tsnaxip1	1.26208	0.0407366
Sdr39u1	1.23389	0.0407949
Dsp	1.31294	0.0415167
Cmtm2a	1.35156	0.0423324
1700100I10Rik	1.76684	0.0423818
Tmem202	1.58896	0.0425263
Mroh8	1.14722	0.043507
Dnm3	1.45472	0.043507
Ccdc113	1.34912	0.0435773
Ube2d2b	1.25835	0.043775
Prss45	1.4352	0.043775
B9d1	1.17418	0.043775
Lrrc34	1.38035	0.043775
Cetn4	1.12053	0.0437966
C2cd4b	1.46238	0.0437966
Ttc12	1.31472	0.0444944
B3galnt1	1.52711	0.0446657
Morn5	1.38421	0.0446657
Mapk8ip2	1.11168	0.0446657
Spink2	1.47638	0.0446657
Gm5134	1.47672	0.0446657
Strc	1.84365	0.0446657
Sgca	1.62343	0.0446657
4930544G11Rik	1.56923	0.0446712
A1cf	1.9275	0.0446712
44451	1.39523	0.0447271
Iqub	1.41021	0.0457867
Slc9c1	1.47832	0.0465827
Armc3	1.54026	0.0466696
Ccdc89	1.50242	0.0468605
4930430A15Rik	1.66593	0.0468605
4922502D21Rik	1.0263	0.0471801
Ankar	1.80348	0.0481211
Mir7214	3.14007	0.0481211
C230037L18Rik	2.21836	0.0482377
4933408B17Rik	1.14503	0.0482377
Adam5	1.06998	0.0483286
Oit1	1.84007	0.0489615
Cetn1	1.30552	0.0489925
Galnt3	1.2874	0.0491297
Pabpc2	1.2916	0.0495457
4930568E12Rik	1.67846	0.0495457
1700108J01Rik	1.82565	0.0495457

## Sheet: round spermatid_up
Supplementary file 4. (G) List of up-regulated genes in round spermatid (log2-fold-change > 1, FDR < 0.05).
Gene symbol	logFC	FDR
Kif20a	1.54559	2.63718e-33
Pabpc6	1.585	7.95448e-32
Aurka	1.36342	1.91366e-31
Dnah10	1.48159	6.01024e-31
Zfp646	1.46403	2.27017e-30
Bms1	1.55478	2.4426e-30
Dnaic2	1.53398	5.46826e-30
Nup188	1.35556	6.50195e-30
Syne2	1.6927	1.88155e-29
Pxt1	1.61903	2.23962e-29
Dhx38	1.49815	3.1221e-29
Atp2b4	1.53423	5.02066e-29
Dennd4b	1.20359	1.81821e-27
Ptch2	1.46804	2.24701e-27
Trpc4ap	1.42398	3.31857e-27
Mapk8ip2	1.31618	4.05484e-27
Wdr33	1.34403	5.03248e-27
Nek2	1.65279	1.58499e-26
Kdm4d	1.34957	8.35491e-26
Sh3gl1	1.26998	1.26832e-25
Rnf40	1.24789	1.50686e-25
Zfp39	1.1861	1.90729e-25
Hspa5	1.16912	3.50837e-25
Calm1	1.17707	3.56353e-25
Plk1	1.21925	3.94016e-25
Srrm2	1.32166	4.15432e-25
Rfx8	1.44124	4.64082e-25
Kif18b	1.26614	8.2837e-25
Bap1	1.21767	8.35713e-25
Gm6588	1.28877	1.00621e-24
Spag1	1.43099	1.06404e-24
Ndufs1	1.27049	1.40909e-24
Wdr19	1.22943	1.84818e-24
1700091H14Rik	1.35391	1.90734e-24
Dcaf7	1.10296	4.16359e-24
Zscan21	1.20643	5.12018e-24
Lrp5	1.09489	1.05422e-23
Ngfr	1.6026	1.60036e-23
Adam15	1.30021	1.71998e-23
Mapkbp1	1.37823	3.09617e-23
Epc2	1.19639	3.72199e-23
Diablo	1.34769	5.05661e-23
Fam216a	1.24181	5.52936e-23
Reep4	1.1893	6.44741e-23
Cog6	1.38283	8.94442e-23
Gm17026	1.34672	9.73925e-23
Usp19	1.29971	1.31914e-22
Ccdc40	1.25527	1.43198e-22
Dnaaf5	1.29527	1.55316e-22
Rusc2	1.46034	1.97476e-22
Sirt3	1.3346	2.64711e-22
Ccdc39	1.3962	2.71357e-22
Pfkm	1.03075	3.57708e-22
Rpa1	1.3649	3.84187e-22
Fam160b1	1.38459	3.87142e-22
Fer1l5	1.02049	7.17346e-22
Ccnf	1.6506	1.32989e-21
Fancd2	1.48955	1.94023e-21
Ppp1r13l	1.1619	2.23376e-21
Atg4c	1.47928	2.37918e-21
Kif7	1.41433	2.54887e-21
Ccna1	1.15719	2.78737e-21
1700040L02Rik	1.17255	2.89473e-21
Cand1	1.11721	3.11236e-21
Mdc1	1.26465	3.12001e-21
Dzank1	1.45924	3.6502e-21
Cfap52	1.22223	3.6502e-21
Dnah8	1.30843	3.76945e-21
Lrrc49	1.30899	4.39007e-21
Capn11	1.22749	4.47547e-21
Cog7	1.46757	8.1316e-21
Nol8	1.20748	9.42898e-21
Dnah2	1.50341	1.48945e-20
Flywch1	1.26414	1.63284e-20
Slc2a8	1.61416	1.79156e-20
Setdb1	1.38098	2.23372e-20
CK137956	1.05549	2.52271e-20
Dnah17	1.16313	3.76836e-20
Dpf2	1.4033	3.78951e-20
Zc3h3	1.06431	5.02818e-20
5031410I06Rik	1.2003	5.18807e-20
Mdn1	1.38554	6.49441e-20
Hirip3	1.07544	6.98079e-20
Top2a	1.32484	7.27425e-20
Espl1	1.3314	9.17916e-20
4930427A07Rik	1.68205	1.24603e-19
Insig2	1.4294	1.476e-19
Atg13	1.12105	1.54795e-19
Cabin1	1.22376	1.96422e-19
Aar2	1.65473	2.59182e-19
4930555G01Rik	1.49738	3.22319e-19
Stmn1	1.05502	3.3199e-19
Nuf2	1.34084	3.68411e-19
Hdgfl1	1.07525	3.77253e-19
Smarca4	1.33087	4.20261e-19
Rassf7	1.26787	4.36635e-19
Ift140	1.04979	4.81495e-19
Sppl3	1.12149	6.13673e-19
Sf3a1	1.22291	7.65156e-19
Cenpf	1.22339	8.38567e-19
Zer1	1.09661	8.39427e-19
Rnf34	1.12176	8.83226e-19
Zmynd10	1.10882	9.18031e-19
Dcaf8	1.24322	9.80168e-19
Trappc8	1.52887	9.89233e-19
Pask	1.05847	1.13136e-18
Dync2h1	1.17976	1.28483e-18
Ganab	1.11199	1.33756e-18
Cntrl	1.30097	1.41225e-18
Fam186b	1.10272	1.68291e-18
Cit	1.35321	1.81885e-18
Dcdc2a	1.33889	1.81897e-18
Stk4	1.41694	1.84503e-18
Pbp2	1.02757	2.21457e-18
Trappc12	1.14104	2.34344e-18
44454	1.01699	2.4488e-18
Scaf4	1.13035	3.38096e-18
Hpcal4	1.3929	3.54779e-18
Prpf8	1.46831	4.2554e-18
Nxt1	1.20127	4.4606e-18
Htt	1.18875	5.68519e-18
Ccar2	1.1073	5.77978e-18
Pde6d	1.21081	6.59192e-18
Card6	1.77988	8.47454e-18
Cltc	1.22221	9.33023e-18
Hmgxb3	1.18481	9.36311e-18
Srp14	1.07482	1.04432e-17
Alas1	1.30163	1.0963e-17
Ecd	1.3529	1.10654e-17
Tbp	1.06043	1.16216e-17
Stk10	1.33065	1.22092e-17
Nfxl1	1.26095	1.30074e-17
Gspt1	1.13504	1.39395e-17
Arhgef10	1.36065	1.42677e-17
Rab5b	1.31094	1.47725e-17
Fyco1	1.0448	1.8775e-17
Ambra1	1.1771	1.88101e-17
Josd1	1.2426	1.91195e-17
Cfap97	1.02054	2.41932e-17
Trim33	1.19251	2.53164e-17
Dnah1	1.12988	2.63953e-17
Dmtf1	1.29611	2.70861e-17
AA467197	1.04809	2.92911e-17
Zbtb32	1.33647	3.38636e-17
9530082P21Rik	1.19306	3.51862e-17
Gtf3c1	1.22219	3.57248e-17
1700029P11Rik	1.21213	4.10254e-17
Tbc1d10a	1.36319	4.29714e-17
Yipf5	1.31476	4.3577e-17
Ccdc151	1.06105	4.50004e-17
H2afz	1.06491	4.60902e-17
Cdc20	1.0809	6.13572e-17
Snrnp200	1.2112	6.44236e-17
Phf3	1.05242	6.5014e-17
Cnppd1	1.13147	6.5014e-17
Fsd1l	1.42881	7.23357e-17
Gm12695	1.35418	8.7749e-17
Smu1	1.21344	9.22877e-17
Stk25	1.27964	9.54646e-17
Myo9a	1.31425	9.70211e-17
Arhgap19	1.02007	9.9774e-17
Dnah6	1.04748	1.11756e-16
Elp3	1.22702	1.29704e-16
Sptan1	1.04609	1.40666e-16
Cnst	1.48186	1.40666e-16
Inppl1	1.37978	1.46677e-16
Cfap46	1.06436	1.49837e-16
Rhcg	1.10972	1.76067e-16
Mga	1.16733	1.95866e-16
Cipc	1.13288	2.61319e-16
Phf13	1.21283	2.82584e-16
Ctr9	1.05733	3.2187e-16
Vcp	1.09788	3.25012e-16
Bbs2	1.21913	3.35173e-16
Cars	1.19902	3.49373e-16
Arl14ep	1.14812	3.78025e-16
Ctc1	1.15469	3.9982e-16
Cutc	1.44805	4.29467e-16
Ddx23	1.54096	4.4354e-16
Ilf2	1.3965	5.77239e-16
Slc2a3	1.54648	5.77239e-16
Mta2	1.4055	5.9608e-16
Cap1	1.31783	6.1635e-16
Lsg1	1.53714	7.00449e-16
Cenpl	1.52694	7.05236e-16
Senp2	1.05927	7.52206e-16
Kif23	1.28124	8.38986e-16
Rnf112	1.51475	8.38986e-16
Cdkl1	1.38186	8.80906e-16
Gstt3	1.57595	9.24004e-16
Ube2o	1.21074	1.0526e-15
Kdm5c	1.34649	1.09571e-15
Dlst	1.1488	1.17166e-15
Arf3	1.10129	1.22379e-15
Pcnxl3	1.29928	1.47398e-15
4933416C03Rik	1.07104	1.53503e-15
Tjap1	1.27547	1.82571e-15
Zfyve16	1.26117	1.97082e-15
Mtmr14	1.21412	1.97805e-15
Mif4gd	1.03054	2.24544e-15
Polg	1.00971	2.40771e-15
Prss42	1.08497	2.54998e-15
Ncapd2	1.3103	2.70478e-15
Pnpla7	1.04203	2.73797e-15
Tuft1	1.79629	2.87378e-15
Mthfr	1.00352	3.05984e-15
Ddx42	1.28486	3.10399e-15
Chgb	1.39059	3.28297e-15
Prdx5	1.0877	3.31113e-15
Pnma1	1.36818	3.40947e-15
Txlna	1.21385	3.73949e-15
Man1b1	1.17761	3.80326e-15
Wdr63	1.03279	3.94347e-15
Nf1	1.08985	4.50208e-15
Kif11	1.25685	4.75033e-15
Dctn6	1.33905	5.93657e-15
Fbxw9	1.10308	6.04834e-15
Ttc21b	1.05369	6.62164e-15
Bin3	1.08919	6.99781e-15
Cenpe	1.12678	7.31143e-15
Slc22a21	1.01755	9.87127e-15
Ap1b1	1.28062	1.01073e-14
Snx19	1.49216	1.15503e-14
Poldip3	1.00516	1.26939e-14
Agtr1a	1.09485	1.30605e-14
Urb1	1.10239	1.31487e-14
Gm15800	1.01751	1.51445e-14
Fxr2	1.19703	1.53171e-14
Fbxl20	1.42838	1.54725e-14
Zdhhc17	1.26654	1.71741e-14
Pik3r4	1.57931	2.26498e-14
Ccdc18	1.10869	2.42726e-14
Hsf5	1.01571	2.5809e-14
Mybl2	1.04828	2.95579e-14
Sf3b1	1.00202	3.90523e-14
Rpap1	1.30721	4.03291e-14
Psmd3	1.26029	4.32562e-14
Pcyt2	1.07294	5.49539e-14
Birc2	1.10907	5.97662e-14
Slc25a31	1.34938	6.1675e-14
Nmd3	1.1734	6.97676e-14
Mapkap1	1.12224	7.27872e-14
Ints3	1.33732	9.24747e-14
Bad	1.22507	9.54603e-14
Timm44	1.12112	1.05021e-13
Nnt	1.02168	1.06018e-13
Adgrv1	1.08089	1.09989e-13
Nolc1	1.45322	1.13745e-13
Plekhm1	1.25216	1.22304e-13
Btaf1	1.09283	1.26751e-13
Aqp9	1.12112	1.31361e-13
Zfp819	1.08433	1.41801e-13
Zfp956	1.48233	1.42174e-13
Arcn1	1.21879	1.49007e-13
Dopey1	1.3355	1.5337e-13
Spo11	1.13343	1.57755e-13
Kctd9	1.14987	1.60787e-13
Ptpn20	1.45591	1.90802e-13
Pex14	1.27284	1.92162e-13
Mpdz	1.21021	2.12818e-13
Rif1	1.20914	2.25442e-13
Kmt2b	1.18362	2.26422e-13
Trim11	1.18751	2.49201e-13
Caps2	1.28346	2.51084e-13
Setx	1.03749	2.5691e-13
Bzrap1	1.37564	3.01892e-13
Lig4	1.09587	3.21763e-13
Incenp	1.20029	3.41525e-13
Cntd1	1.17427	3.47361e-13
Pak4	1.13378	3.89208e-13
Maf1	1.17655	3.94358e-13
Atr	1.24798	4.43442e-13
Xrcc4	1.13292	4.5031e-13
Edc4	1.60312	4.83802e-13
Proser3	1.1631	5.23257e-13
Cdh2	1.15428	5.80402e-13
Cdk20	1.40568	5.85088e-13
Scaf1	1.06508	6.0953e-13
Tmem130	1.20341	6.13364e-13
Fbxo28	1.27504	6.13364e-13
Dennd3	1.2046	6.29186e-13
Spdye4a	1.62257	6.30332e-13
Bub1b	1.47019	7.66625e-13
Sec22a	1.38694	7.80081e-13
Gon4l	1.32709	9.34348e-13
Ryr3	1.04976	9.95053e-13
AI987944	1.05965	1.06369e-12
Nid2	1.5728	1.10262e-12
Faf2	1.02779	1.16369e-12
Crtam	1.18278	1.21805e-12
Cd5l	1.13098	1.23123e-12
4930444M15Rik	1.09138	1.23613e-12
Bbs4	1.2606	1.34883e-12
Gm5134	1.3189	1.34883e-12
Rrp7a	1.20435	1.36445e-12
Tcam1	1.36503	1.37209e-12
Efcab8	1.75493	1.67081e-12
Pcid2	1.01554	1.69079e-12
Sh2b1	1.35092	1.69079e-12
Ncln	1.16488	1.69792e-12
Dtx2	1.09007	1.76613e-12
Ncoa3	1.23768	1.82158e-12
Sprtn	1.53359	1.99282e-12
Parp1	1.15323	1.99918e-12
Nup37	1.22084	2.20282e-12
Pan2	1.33798	2.27739e-12
Stk11ip	1.3247	2.7635e-12
BC030867	1.16334	2.97047e-12
Mfsd12	1.20539	3.07993e-12
Ruvbl1	1.0793	3.12493e-12
Spdye4b	1.45805	3.30369e-12
Bcas3	1.12321	3.31858e-12
Prr14l	1.00468	3.45916e-12
Heatr1	1.09531	3.45916e-12
Zbtb5	1.21188	4.05448e-12
Zbtb40	1.40634	4.9544e-12
Ccdc166	1.02551	5.46054e-12
Baz1b	1.26461	5.6889e-12
Vps11	1.1244	6.28993e-12
Spns1	1.82554	6.75969e-12
Nap1l4	1.33038	6.81499e-12
Rgl2	1.20288	7.60201e-12
Tti1	1.22434	7.96207e-12
Utp14b	1.09797	8.07867e-12
Fig4	1.02624	8.19074e-12
Urb2	1.00086	8.725e-12
Golga1	1.45389	8.736e-12
Adgrl2	1.06828	8.9222e-12
Trank1	1.20368	9.00481e-12
Extl2	1.08843	9.3652e-12
Rbm44	1.06066	1.00049e-11
Phactr3	1.20842	1.00927e-11
Alkbh5	1.061	1.05203e-11
Nab2	1.16379	1.0595e-11
Slc19a2	1.3974	1.09989e-11
Cep152	1.11395	1.24412e-11
Cacng5	1.14195	1.25583e-11
Ppp2r4	1.14619	1.27072e-11
4930449I24Rik	1.44603	1.33704e-11
Cog2	1.15902	1.35051e-11
Dennd1a	1.04475	1.38307e-11
Ddx47	1.44057	1.50256e-11
Kif24	1.07174	1.70347e-11
Jrk	1.22846	1.70613e-11
Sfswap	1.19421	1.86639e-11
Odf2l	1.01443	1.88572e-11
Sox17	1.11201	2.05802e-11
Nicn1	1.23045	2.23685e-11
Arhgef10l	1.04452	2.3096e-11
Usb1	1.19505	2.42531e-11
Fastkd3	1.57531	2.51428e-11
Bdp1	1.68272	2.95925e-11
Slc12a5	1.21236	3.31267e-11
Hmces	1.09458	3.32334e-11
Zkscan7	1.76019	3.3446e-11
Atp6v1b2	1.08786	3.91168e-11
Gclm	1.26243	4.13137e-11
Rbm10	1.08175	4.16312e-11
Catip	1.00474	4.25333e-11
Vangl2	1.48777	4.26977e-11
Cpsf4	1.7904	4.47429e-11
Eps8l3	1.18785	4.64458e-11
Lhb	1.15122	4.75585e-11
Ano1	1.1196	4.92269e-11
Dync2li1	1.00348	5.13675e-11
Ssxb2	1.52164	5.14893e-11
Rufy1	1.31871	5.17477e-11
Gpn1	1.11608	5.23649e-11
Lars	1.13059	5.98811e-11
Slc12a2	1.4064	6.16648e-11
Gabpa	1.11879	6.43044e-11
Coq9	1.27764	6.53506e-11
Emc7	1.05481	6.7566e-11
Apba1	1.09543	7.10997e-11
Wrn	1.06809	7.24642e-11
Pgap1	1.02358	7.25406e-11
Crocc	1.22985	7.54365e-11
Pramef8	1.14143	7.80372e-11
Arhgap10	1.31913	7.97166e-11
Klhl21	1.47393	8.01174e-11
Kmt2d	1.34646	8.21063e-11
Klhl8	1.02932	1.00555e-10
Ykt6	1.14892	1.06696e-10
Wdr73	1.16212	1.10933e-10
Ipo9	1.10543	1.17883e-10
Mcm3ap	1.2394	1.19178e-10
Zfp62	1.08023	1.20761e-10
Gtf3c4	1.4127	1.24353e-10
Cmpk2	1.68048	1.3313e-10
Rhov	1.03769	1.43649e-10
Polr2e	1.28306	1.54096e-10
Tmem30c	1.01235	1.63341e-10
Wdr47	1.00363	1.72637e-10
Tmem127	1.08915	1.75416e-10
Cbll1	1.08374	1.77961e-10
Gabarapl2	1.10733	1.79605e-10
Top3a	1.32427	1.93621e-10
Usp5	1.25573	2.0749e-10
Tyw1	1.2933	2.10768e-10
Cdc5l	1.19377	2.17012e-10
Angel2	1.14163	2.38972e-10
Xpot	1.13965	2.49335e-10
Ppip5k1	1.06183	2.57299e-10
Gpr108	1.09923	2.65084e-10
Wdr34	1.02442	2.82705e-10
Gm10220	1.26346	2.9042e-10
Snx14	1.09347	2.99185e-10
Epyc	1.32569	3.2048e-10
Pik3r3	1.0258	3.51344e-10
Fancg	1.55188	4.19056e-10
Atp8b5	1.0561	4.24534e-10
2810029C07Rik	1.02986	4.33321e-10
Synj1	1.14449	4.87459e-10
Cdkl4	1.13437	4.88763e-10
Faah	1.07199	4.98722e-10
Cblb	1.32856	5.72421e-10
P4ha2	1.25125	5.82106e-10
Scyl2	1.23591	6.377e-10
Jakmip1	1.16407	7.70665e-10
Rilpl2	1.06368	7.70928e-10
Muc5b	1.89987	8.87152e-10
Ighmbp2	1.78145	9.23676e-10
Pnn	1.06245	9.34631e-10
Tpx2	1.14258	1.00946e-09
Anln	1.0435	1.02009e-09
Zbtb42	1.12766	1.0295e-09
Sdhc	1.1969	1.16416e-09
Khnyn	2.50325	1.19418e-09
Mettl25	1.07559	1.2412e-09
Zfp445	1.17266	1.3021e-09
Thg1l	1.06342	1.3255e-09
Lztr1	1.14029	1.34073e-09
Pbk	1.03881	1.4182e-09
Luc7l	1.55829	1.45323e-09
Scn7a	1.18609	1.55347e-09
Rock1	1.0094	1.61728e-09
Rqcd1	1.0732	2.08447e-09
Enpp4	1.21194	2.09452e-09
Rbm19	1.37642	2.12038e-09
Tchp	1.13617	2.1406e-09
Txndc12	1.16976	2.28561e-09
Ppfia2	1.12896	2.43905e-09
Hnrnpm	1.23392	2.57975e-09
Hhatl	1.0653	2.76107e-09
Xrn1	1.08642	2.88094e-09
Mki67	1.23681	2.91794e-09
Noc4l	1.39436	3.0471e-09
Ick	1.28923	3.09797e-09
Adh7	1.03469	3.26216e-09
C2cd2l	1.35623	3.52444e-09
Rnls	1.00156	3.76488e-09
Pola2	1.28413	3.82368e-09
Akap11	1.11123	3.82368e-09
Lnpep	1.27388	3.90934e-09
4930511A02Rik	1.30305	3.92141e-09
Radil	1.00414	4.16503e-09
Dfna5	1.63033	4.16503e-09
Dyx1c1	1.3048	4.28492e-09
Iffo1	1.14285	4.4681e-09
Fam19a4	1.54367	4.47922e-09
Fam208a	1.07801	4.70977e-09
Atxn7l3b	1.03193	5.70238e-09
Krr1	1.05182	5.8825e-09
Smoc1	1.04827	5.94995e-09
Pafah2	1.22561	6.368e-09
Kmt2c	1.2161	6.43144e-09
Toe1	1.12703	6.6311e-09
Cep44	1.21621	6.85724e-09
Plrg1	1.13788	8.34876e-09
Sae1	1.14762	8.34876e-09
Madd	1.17771	8.89479e-09
B3galnt2	1.09481	9.73152e-09
Bbs10	1.34521	9.75593e-09
Atrnl1	1.04708	1.01781e-08
Ccdc42b	1.12573	1.01784e-08
Zfp748	2.24097	1.26407e-08
Ptpn21	1.04709	1.30659e-08
Tmem230	1.0523	1.30659e-08
Larp4b	1.26973	1.38109e-08
Clic4	1.1061	1.44671e-08
Gm3002	1.22263	1.44671e-08
Bbs1	1.03466	1.46397e-08
Cep250	1.10318	1.51289e-08
Ly9	2.33141	1.61317e-08
Smek2	1.00878	1.62928e-08
Zfp609	1.0467	1.67969e-08
Sec11a	1.03348	1.83848e-08
Snupn	1.02408	1.93563e-08
Nup210	1.33083	2.05585e-08
Them6	1.03215	2.05665e-08
Sez6	1.31461	2.16285e-08
Lclat1	1.13013	2.20603e-08
Trrap	1.20481	2.24368e-08
Sdcbp	1.18638	2.46823e-08
Trmt1l	1.08401	2.61851e-08
Rrm1	1.29627	2.70369e-08
Gm3636	1.5299	2.71139e-08
Gm6370	1.26689	2.85778e-08
Focad	1.14092	2.87113e-08
Maml1	1.08388	3.26211e-08
Sf3b3	1.275	3.44513e-08
Ssxb1	1.44476	3.44513e-08
Eif6	1.01415	3.46125e-08
Slc35a2	1.24062	3.5356e-08
Acp2	1.16865	4.08469e-08
Prepl	1.03479	4.10133e-08
Gm7173	1.17743	4.15555e-08
Stom	1.27283	4.49807e-08
Zap70	1.52399	4.73837e-08
Fam98b	1.08097	4.78941e-08
Ipo11	1.04814	4.95946e-08
Dolpp1	1.12979	5.47089e-08
Armc8	1.1718	5.70208e-08
Coa3	1.20575	5.7077e-08
Tnfaip1	1.04658	5.73186e-08
Fanci	1.20367	5.9685e-08
Nob1	1.63741	7.12591e-08
Dpp9	1.1472	7.14959e-08
Zc3h7a	1.11364	7.22837e-08
Abca5	1.13785	7.67e-08
Aspm	1.08902	7.73912e-08
Slc1a7	1.44341	7.92655e-08
Adsl	1.24422	8.11338e-08
Nck1	1.14055	8.19247e-08
Clcc1	1.34727	8.3231e-08
Enthd2	1.26906	8.43502e-08
Bod1l	1.13367	8.60847e-08
Gm6408	1.23382	9.0013e-08
Adcy6	1.8106	9.00426e-08
Speer4a	1.1974	9.2349e-08
Fam214a	1.25396	9.85579e-08
Numb	1.22718	9.97732e-08
Casc5	1.17431	1.02582e-07
Exd2	1.24134	1.08903e-07
Ppwd1	1.02436	1.17785e-07
Syne1	1.00706	1.20807e-07
Mnat1	1.26497	1.21311e-07
Atg14	1.2167	1.27043e-07
Ring1	1.0844	1.31355e-07
Gm6583	1.73227	1.38196e-07
Isoc2a	1.21092	1.38888e-07
Gdpd4	1.15389	1.45279e-07
Thbs1	2.30428	1.49342e-07
Tbccd1	1.08787	1.50456e-07
Snx11	1.61657	1.59149e-07
Tmem55b	1.54548	1.65894e-07
Fam129a	1.05181	1.72255e-07
Psmb1	1.20232	1.80452e-07
Fam53b	1.45951	1.83491e-07
Zak	1.44879	1.94482e-07
Pagr1a	1.12264	1.95205e-07
Gm5862	1.80479	2.00883e-07
Nutm2	1.62773	2.04322e-07
Pced1a	1.09704	2.13609e-07
Hist2h2be	1.21314	2.25327e-07
Pcgf6	1.04456	2.52769e-07
As3mt	1.16128	2.74654e-07
Trmt13	1.29765	2.89727e-07
Cdc23	1.24492	3.06863e-07
Sema3f	1.29318	3.06863e-07
Sigmar1	1.3786	3.37878e-07
Parp12	1.38814	3.409e-07
Gpsm2	1.2574	3.41811e-07
Glipr1l2	1.29432	3.42257e-07
Sgol2a	1.15891	3.63961e-07
Cry1	1.10181	3.81109e-07
Neil3	1.23282	3.95521e-07
Zfp202	1.24208	4.59138e-07
Gsc	1.54361	5.07563e-07
Mrpl44	1.98916	5.14932e-07
Zfp661	1.93858	5.40665e-07
4930518J21Rik	1.39292	5.66224e-07
Scly	1.08538	5.77311e-07
Lmtk2	1.29369	5.87147e-07
Zfp955b	1.2539	5.91015e-07
Fchsd1	1.40219	5.95016e-07
D6Ertd474e	1.09872	6.13428e-07
Edem3	1.0434	6.50372e-07
Myt1l	1.14666	6.63042e-07
4930581F22Rik	1.58022	7.12213e-07
Glyctk	1.03121	7.12552e-07
Mks1	1.84529	7.80952e-07
Kif4-ps	1.29564	1.05259e-06
Zfp42	1.34089	1.07405e-06
Pi4kb	1.00682	1.15684e-06
Cdca8	1.27411	1.17566e-06
Cstf2t	1.33766	1.21277e-06
Cirbp	1.0586	1.2544e-06
Itpkc	1.31136	1.2757e-06
Gins1	1.03685	1.31097e-06
Pin1rt1	1.14686	1.38878e-06
Atp13a1	1.02229	1.41701e-06
Aurkb	1.42153	1.42056e-06
Gm7361	1.08511	1.45697e-06
Slc5a3	1.3232	1.56153e-06
Gin1	1.45587	1.56153e-06
Slc25a44	1.08157	1.69264e-06
Cyb561	1.08509	1.7788e-06
Amt	1.7459	1.91853e-06
Rabggtb	1.25612	2.01048e-06
Vps39	1.25089	2.40945e-06
Gm10532	1.30464	2.46091e-06
Rbl1	1.09812	2.50042e-06
Rbm48	1.02946	2.52878e-06
Cdk1	1.14584	2.8693e-06
Gpr61	1.20431	2.87505e-06
Ahcy	1.18084	2.92177e-06
Pno1	1.00141	2.9916e-06
Tmem39a	1.14316	3.02548e-06
Ssxb3	2.1789	3.06976e-06
Msantd2	1.65349	3.38805e-06
Usp11	1.13769	3.71209e-06
Cdc42bpg	1.52581	3.86758e-06
Adprm	1.62472	3.94526e-06
Cep55	1.13176	3.97822e-06
Ncaph	1.74266	4.05718e-06
Adamtsl5	1.29489	4.27281e-06
Syna	1.2099	4.3154e-06
Slc37a1	1.40389	4.33923e-06
Ppp1r27	1.41252	4.4228e-06
Xrcc5	1.1081	4.44168e-06
Gtf3c5	1.31326	4.51788e-06
1700123O20Rik	1.0662	4.54672e-06
Map3k5	1.07067	4.88363e-06
Gm16432	1.25227	5.08115e-06
Slc35f6	1.41041	5.23471e-06
Traf2	1.47225	5.88793e-06
1700012D14Rik	1.65956	5.92927e-06
Preb	1.32767	6.23015e-06
Cnnm4	1.12438	6.54802e-06
Cdkn2d	1.14739	6.86069e-06
Faap24	1.22568	7.56366e-06
Ssxb6	1.33845	7.57695e-06
Crkl	1.04469	7.82079e-06
Col4a3	1.27461	7.82567e-06
Fcna	1.08502	7.82567e-06
Nudt16l1	1.25518	8.02565e-06
Phkb	1.02997	9.21169e-06
Adap1	1.1543	9.45084e-06
Efcab7	1.12457	9.52237e-06
Gm3404	1.25622	9.52237e-06
Tmed8	1.12192	9.57408e-06
Klhl18	1.40941	9.85973e-06
Jagn1	1.28777	9.94143e-06
Zfp94	1.5239	1.03016e-05
Ubiad1	1.04998	1.06321e-05
Snapc1	1.28128	1.07783e-05
Ppp5c	1.21221	1.08971e-05
Uhrf2	1.01775	1.12777e-05
Tlx1	1.92161	1.16014e-05
BC055324	2.2595	1.22934e-05
Nefh	1.18378	1.23991e-05
Ddx11	1.32005	1.28908e-05
Wdr8	1.28363	1.30759e-05
Sdhd	1.30141	1.31511e-05
Spdl1	1.84906	1.34643e-05
Camk1d	1.29991	1.34643e-05
4931431C16Rik	1.19209	1.39398e-05
Dennd2c	1.41186	1.40836e-05
Hinfp	2.30091	1.5296e-05
Vps45	1.25734	1.6213e-05
Them4	1.16419	1.64366e-05
4921525O09Rik	1.84977	1.82165e-05
Atp7b	1.21517	1.82165e-05
D6Ertd527e	1.08346	1.86963e-05
Gm13446	1.23748	1.90136e-05
Gm16853	1.13391	1.91496e-05
Dlgap5	1.35827	1.98823e-05
Ccdc58	1.12854	2.03532e-05
Lrba	1.00328	2.19095e-05
Trmt44	1.23406	2.27822e-05
Pnrc2	1.1725	2.28059e-05
Gm3558	1.10371	2.2992e-05
Ccp110	1.03656	2.44074e-05
Gm1322	3.15249	2.48047e-05
Efna3	1.16538	2.535e-05
Unk	1.25468	2.68207e-05
Ddx31	1.3063	2.80186e-05
Lpxn	1.00314	2.88887e-05
Exph5	1.46896	2.97038e-05
Capns2	2.55672	3.28638e-05
Ddx51	1.40041	3.34813e-05
Pcdhga3	1.18706	3.41552e-05
Gins2	1.1305	3.45259e-05
Ccno	1.03861	3.45348e-05
Pigu	1.02435	3.46035e-05
Trpv1	1.30275	3.87901e-05
Adrb1	1.21982	4.16644e-05
Chdh	1.23367	4.3992e-05
Rad50	1.05533	4.56637e-05
Lrp11	1.0371	4.57339e-05
G630093K05Rik	1.10641	4.91757e-05
Skil	1.30456	5.25567e-05
Ndc80	1.13491	5.33061e-05
Igfbp4	1.07086	5.35127e-05
Speer4d	1.00284	5.68455e-05
Zfp26	1.31715	5.83303e-05
Endou	1.24726	5.95496e-05
Ncapd3	1.2944	6.09051e-05
Kndc1	1.62927	6.24494e-05
Zbtb49	1.70658	6.42559e-05
Tmem138	1.02902	6.51483e-05
Cdk5rap1	1.5923	6.59973e-05
Casp2	1.95833	6.65222e-05
Tysnd1	1.02862	6.75443e-05
Pla2g3	1.19601	6.96431e-05
Krt73	1.47019	7.34397e-05
Nol11	1.23147	7.8128e-05
Dmrt2	2.03657	7.90448e-05
Bcl2l15	2.10083	8.07073e-05
Lsm8	1.15863	8.79831e-05
Pgf	1.15667	8.97336e-05
Col11a2	2.34212	9.1306e-05
Ythdf1	1.31233	9.43328e-05
Lrrc32	2.25966	9.4636e-05
Wdr61	1.07656	0.000101578
Plod3	1.33575	0.000101957
Lrch3	1.37908	0.000106433
1700069L16Rik	1.40607	0.000108023
Ptcd1	1.01068	0.000108479
C330018D20Rik	1.04248	0.000111019
Vwa1	1.10099	0.000123736
Gopc	1.15382	0.000134645
Nup54	1.27303	0.000138795
Zkscan14	1.17395	0.000144257
Zcchc12	1.04196	0.000144642
Lhfpl3	1.43907	0.000151733
Slc28a1	1.1123	0.000158375
Il33	1.53069	0.00016041
Rmst	1.15971	0.000163577
Tmem199	1.43539	0.000164064
Urm1	1.16324	0.000168807
C920006O11Rik	2.62689	0.000175864
Itgb3	1.79878	0.000175999
Slc30a5	1.05535	0.000180311
BC027072	1.06356	0.000187358
Polr2b	1.06412	0.000189233
Tor1a	1.38813	0.000197204
Gm3402	1.48839	0.000201398
Tspyl4	1.2449	0.000205868
Ssxb8	2.40567	0.000209195
Adat1	1.70326	0.000210289
Tmem17	1.34119	0.000211638
Zbed5	1.19293	0.000217389
Fam83h	1.07135	0.000243944
Phldb3	1.13847	0.000268411
Astn1	2.15506	0.000270514
Akap13	1.02582	0.000272274
Gm14459	1.78334	0.00027897
Pex10	1.68736	0.000287839
Ice2	1.26081	0.00028871
Il20ra	1.21322	0.000319235
Icosl	1.58419	0.000339976
Abcb8	1.02872	0.000341459
Ikzf5	1.25128	0.000342427
Gm10354	1.01099	0.000347861
Fam189b	1.24223	0.000351802
Ets2	1.72599	0.000364216
Harbi1	1.20742	0.000377435
Tmem38b	1.23782	0.000389867
Tia1	1.14961	0.000392702
Gm21284	1.09853	0.000403169
Rnase10	1.27532	0.000405239
Gm10941	1.26063	0.000405395
Hdhd3	1.36113	0.000415576
Mis12	1.51103	0.000423007
Nelfcd	1.00607	0.000426843
Zfp668	1.12161	0.000435783
Eppk1	1.21574	0.000444066
Gabra5	1.06058	0.000495698
Pggt1b	1.54864	0.000497676
Lamp3	1.95993	0.000520342
Cep97	1.22587	0.000525579
Pdgfa	1.36736	0.000534204
Emilin3	1.20603	0.000542067
Atg9b	1.43735	0.000547581
Zfp180	1.03265	0.000557082
E130309D14Rik	1.0443	0.000557863
Plch2	1.73033	0.00056203
Yipf7	1.20789	0.000569648
Ckap2	1.88952	0.00057544
Pbld2	1.66225	0.000606383
Baiap3	1.67219	0.00060988
Fras1	2.12571	0.000648503
Rce1	1.15588	0.00065105
Pddc1	1.47681	0.000685018
Zfp407	1.07513	0.000686611
Strc	6.05652	0.000688113
4930544M13Rik	1.13281	0.000734771
Adcy1	1.09576	0.000760087
Mtx2	1.09837	0.000783708
Gigyf1	1.58908	0.000810277
Olfr1508	1.18849	0.000815801
Mtr	1.32824	0.000825589
Hibch	1.23929	0.000834792
Ugt2b34	1.678	0.000843367
Magohb	1.35267	0.000879453
Frs3	1.35468	0.000881434
Adcyap1r1	1.36348	0.00088172
1700123I01Rik	1.38496	0.000892741
Caap1	1.00606	0.00095537
Eral1	1.08769	0.000970291
Gpr35	1.42849	0.000988221
Fgfr3	1.84141	0.00102544
Nlrp4f	1.73821	0.00104883
Cd27	1.0598	0.00111807
Fgf21	1.1189	0.00112105
Papln	1.04041	0.00112591
Iqcc	1.20256	0.00112656
Kbtbd8	1.14487	0.00118122
Arhgap11a	1.39054	0.00119745
Mapk11	1.7602	0.00122014
Wdr6	1.09605	0.0012662
Lct	5.81359	0.00128387
Fgf2	2.72933	0.00132554
Zfp518a	1.13131	0.00143329
Adck2	1.1082	0.00144578
Kri1	1.09953	0.00148308
Tmem186	1.06754	0.00149809
Slc8a1	1.00858	0.00150213
Ankdd1b	1.52931	0.00151257
Dlgap2	2.67878	0.00153063
Galnt18	1.40476	0.00155226
Espnl	3.98003	0.00171751
Klb	1.45109	0.00171902
Gm12888	1.90475	0.00173266
Kidins220	1.14612	0.00173266
Aym1	1.20974	0.00175227
Phf2	1.40423	0.00175378
Bcl2l12	1.53307	0.00175411
Cyp11b1	2.4878	0.00182052
Col4a5	1.081	0.00185857
Ssxb10	2.47701	0.00186083
Slc25a14	1.34388	0.00190035
Slc16a5	1.76058	0.00194725
Macc1	1.1139	0.00195696
Pop7	1.54763	0.00196137
Aph1c	1.07121	0.00197552
Lin52	1.19311	0.00200263
Mir8112	1.12184	0.00207476
Hpgds	1.16332	0.00210312
Rbm45	1.19658	0.00210331
Gpatch4	1.4497	0.00219833
Gp5	1.47071	0.00222046
Ric3	1.16934	0.00222735
Wdr3	1.04998	0.00227751
Hgd	1.19685	0.00249088
Pik3cb	1.08415	0.00251725
Ano5	1.10419	0.00256073
Batf2	3.53369	0.00256421
Csrp2bp	1.23928	0.00258352
Ttc8	1.14507	0.00261407
Hdac8	2.67979	0.00261803
Ccdc64b	1.67605	0.00266975
Hus1	1.05787	0.00269325
Mtif2	1.00002	0.00271744
Efcc1	1.86999	0.00272729
Ssx9	1.72128	0.0027428
Bcdin3d	1.23295	0.00278896
F3	1.83874	0.00284955
Fstl1	1.57519	0.00286973
Ganc	1.02044	0.00288469
Fam72a	1.00646	0.00289184
Kirrel2	1.29049	0.00289315
Cmtr1	1.59223	0.00308106
Mboat7	1.09388	0.00309885
Npc1l1	2.99765	0.00314224
Cldn9	2.57283	0.00317812
Urah	2.57331	0.00325297
Chac2	1.18065	0.00327182
Zfp287	1.69578	0.00328949
4933412E24Rik	1.19775	0.00332299
Meiob	1.28546	0.00336488
Krt10	1.31323	0.00337046
Tango2	1.32859	0.00342007
Cish	1.5027	0.00352111
Epor	1.50277	0.00353118
Grpel2	1.0523	0.00353118
4632428N05Rik	1.10959	0.00364854
Ttc33	1.00823	0.00365243
Bahcc1	1.33024	0.00366785
Timm10	1.30325	0.00380806
Morc1	1.05494	0.0038623
Tex16	1.05707	0.00389509
Dnmt1	1.01206	0.00390107
Atg101	1.00584	0.00420006
Palb2	1.06055	0.00434385
Fzd1	1.16526	0.00437567
Usp10	1.07914	0.00438891
Fuk	1.11902	0.00443677
BC039966	1.74911	0.00444262
Taf1c	1.17719	0.00450698
Erbb2	1.09575	0.00464555
Unc13c	1.18537	0.00469968
Klhl30	5.8119	0.00476194
Olfr1509	1.32527	0.004784
Chac1	1.05153	0.0047969
Trim23	1.17081	0.0048988
Tsen15	1.32635	0.00494054
Zcchc14	1.08444	0.00499021
Zscan25	2.23562	0.00525166
Mettl13	2.02503	0.00527475
Olfr702	1.91087	0.00528072
Kdm8	1.48008	0.00537462
Tdpoz3	1.70284	0.00538199
Vldlr	1.06316	0.00540909
Gtf3c6	1.11815	0.00566668
Gpr68	1.38606	0.0058393
Gm21671	1.61556	0.00603919
Zfp955a	1.31718	0.00616977
4933408B17Rik	1.12037	0.00623204
Myf6	2.23473	0.00623843
Pcdhgb5	5.52002	0.00635338
Swap70	1.15186	0.00640919
Cst6	1.52267	0.00643917
BC051226	1.34773	0.00647585
Pet2	1.15598	0.00656099
2610042L04Rik	1.00384	0.00656994
Zfp213	1.58549	0.00660715
Spsb4	2.87283	0.00722863
Nkx2-4	1.23429	0.00723183
Gbp8	1.70541	0.00724393
Lipt2	1.13769	0.00725286
Gm6524	3.28998	0.00746319
Tbx6	2.1814	0.00806216
Gm2897	1.49764	0.00831444
Fah	1.22459	0.00849885
Mfap2	2.93769	0.00887118
4930426L09Rik	1.05312	0.00930894
Fbln5	1.03311	0.00933025
4930481A15Rik	2.56936	0.00940631
Moap1	1.01574	0.00954747
Arv1	1.37763	0.00960266
Sh3bp5l	1.07354	0.00963272
Gm5796	1.52674	0.00966585
Wnt5b	1.03266	0.00973882
Slc4a10	1.9691	0.0099136
Plcd3	1.34918	0.0100947
Taf8	1.20546	0.0102092
Ferd3l	5.28489	0.0102974
Zfp772	1.46751	0.0104344
B3galnt1	1.91819	0.010621
D330023K18Rik	1.83121	0.010676
Rab20	1.06586	0.0106938
Vmn2r70	3.19871	0.010735
Rpusd1	1.5224	0.0107724
Gpx8	1.15913	0.0108941
Gjc1	1.18498	0.010911
Skint3	1.55523	0.0111877
Szt2	1.23071	0.011461
Exog	1.29978	0.0115422
Gm17769	1.12273	0.0115446
Gm1979	2.12661	0.0116671
Kcns2	1.59145	0.0118377
Emc1	1.07335	0.0120181
Nek5	1.01014	0.0127506
Tmprss11d	1.21439	0.0128454
Ssxb5	1.5252	0.0130098
Slc4a4	1.09744	0.0136509
Rundc3b	1.39256	0.0136987
Dock11	1.87233	0.0139521
Psd2	1.40827	0.014152
Yes1	1.10859	0.0141611
Rwdd2b	1.0799	0.0144293
Slc7a2	1.3769	0.0146861
Sectm1b	1.19875	0.0153798
Kif5a	1.08695	0.0153798
Itga2b	1.15071	0.0154353
Mpp4	1.38416	0.0160345
Sidt1	2.12441	0.0161661
Fam83d	1.05917	0.0162939
Tmco6	1.03104	0.0165488
Ano9	1.49578	0.0165488
Rhbdl1	1.63156	0.0169456
Nr1i2	1.87437	0.0173907
Fbxl18	1.03013	0.0176297
Cryba2	1.349	0.0177785
Susd2	1.30139	0.0182778
Cyp2b19	1.0468	0.0183543
Gfi1	1.70203	0.0188543
Nrl	5.15099	0.0189044
Rasgrp4	1.64338	0.0189136
Barhl1	1.60132	0.0190432
Prx	1.5187	0.0196651
Shroom1	1.11572	0.0202227
Mettl1	1.2741	0.0203588
Gm5477	1.01601	0.020567
BC021767	2.335	0.0206648
Prss36	1.78865	0.0206667
Grhl2	1.09397	0.0207445
Pusl1	1.00782	0.0210782
Rtp1	1.14111	0.0213935
Atp6v1c2	1.02761	0.0219918
Tyw5	1.45411	0.0225587
A730056A06Rik	3.37404	0.022643
Il1a	1.39846	0.0236713
Cbx8	2.00715	0.024097
2210409E12Rik	1.65677	0.0258154
Pidd1	1.56006	0.0262118
Gmip	1.40857	0.0262569
Olfr1507	1.55816	0.0265644
Fam81a	1.16989	0.0275245
Olfr655	3.1985	0.0275544
Man2c1os	1.02153	0.0281701
Pcdha10	2.58873	0.0282759
Echdc1	1.19416	0.0282839
Gsdmc	2.88366	0.0289732
Elmod1	2.88297	0.0289918
4930564D02Rik	1.03174	0.0298297
Gm10509	2.88356	0.0298439
Olfr279	2.88356	0.0298439
Mettl10	1.65691	0.0314565
Zfp420	1.51865	0.0322247
Krt78	1.1417	0.0327374
Hlcs	1.00578	0.0333554
Fmo4	1.7607	0.0333913
Cps1	1.20017	0.0334454
Trit1	1.29765	0.0336399
Rpusd4	1.06462	0.0345302
Gdf5	1.94379	0.0346942
Mrgpra4	5.00332	0.0352638
Gm9899	5.00332	0.0352743
Rprml	1.11543	0.0356063
Kctd18	1.1058	0.0364077
Pnldc1	1.14265	0.0364782
4930487H11Rik	1.14043	0.0377918
Kel	1.28419	0.0378675
Il1rl1	2.50779	0.0381239
Dgkg	1.14452	0.0391627
Clmp	1.27042	0.0401519
Tmem235	1.02273	0.040281
Psg17	1.36794	0.0408767
Mug2	1.40883	0.0410613
4930486L24Rik	1.00413	0.0411095
Zfp408	1.0512	0.041379
Tmprss5	1.44176	0.0413849
AA543186	1.08916	0.0419485
Cldn2	1.72653	0.042833
Gm17296	2.5074	0.0430357
Rpa2	1.22415	0.0432517
Ddx28	1.17992	0.0433762
Krt18	1.7615	0.0465049
Gm20125	1.43731	0.0477277
Gpr141	2.76131	0.0480342
Gm19522	2.76056	0.048079
Hsh2d	2.76056	0.0480896
Gm20750	2.76056	0.0480896
Krt76	1.21785	0.0484542
Tmprss7	1.08428	0.0488759
