# Supplementary material for: Epi-mutations for spermatogenic defects by maternal exposure to di(2-ethylhexyl) phthalate
Source: eLife. 2021 Jul 28;10:e70322. doi: 10.7554/eLife.70322 (PMC8318585; doi:10.7554/eLife.70322)
Supplement: Supplementary file 5. [file elife-70322-supp5.xlsx]

## Sheet: Sheet1
Supplementary file 5. Primers used in this study.
Experiment	Primer name	Forward	Reverse
Bisulfite sequence	Hist1h2ba-1_outer	GTAGTTTATGTTTAATATTTGATTGG	CTATCACAAAAAAATTCATAATACTCATA
	Hist1h2ba-1_inner	ATGATGGATTAATTAATTAGAAATTATAGT	AAATATAAATAAAATAACTCTCCTTAC
	Hist1h2ba-2_outer	TATTAAGATTTAGAAAAAGGAGGGT	CAACTCTCTCAACAAAAAAAATAA
	Hist1h2ba-2_inner	TATTTATAAGGTGTTGAAATAAGTG	ACAAAAAAAATAAATAACTCTTAAAAAAAC
	Sycp1_outer	GGGTTTTTAGGAGGTTTTGAGG	AACAATATAAAAAACTTTTACTTCTCCATA
	Sycp1_inner	GGTTTTTAGGAGGTTTTGAGGG	ATAAAAAACTTTTACTTCTCCATACTACCT
	Taf7l_outer	TGTTTTTTTAAGGGAATTATTTTGTATAA	AAAAATCTTCTAAAACTTAACCCTACC
	Taf7l_inner	GGGTTTTGGTGGAGGTTAAAGTTT	TATCACAAATATCCCCAACACCTTC
Quantitative RT-PCR	Arbp	AGATTCGGGATATGCTGTTGGC	TCGGGTCCTAGACCAGTGTTC
	Asz1	ACGGCTGGGATATTGGGTAT	ATATCTCCGGTGGTCAGTGC
	Ddx4	CTGTCAGACGCTCAACAGGA	CGTGTCAACAGATGCAAACA
	Hist1h2aa	GGGAACTACGCACAACGAAT	GAGGAGTAATGCGCGTCTTC
	Hist1h2ba	AACGTAAGAGATGCCGCAAG	ATGCGCTCGAAGATGTCTGT
	Sycp1	CATGCTCGAACAGGTTGCTA	CAGTCTGCTCATTGGCTCTG
	Taf7l	GCCTCCGGAACAAGCTTATG	GTTTAGCAGGCAGTGAGACG
	Tdrd1	CTCCTCTTCCTCTTAAACAATCCA	GGCGTTTGCTGTCTCTTTCT
	Tex13	TGCTCCAAGTCCTCAGGTAGA	TGGGAGATAGGACTCTTCCAGTT
	Gfra1	TTTTACTGACAGTTGCGTCCAC	TGAATGTGCTTCTGCTCAAAGTG
	Sycp3	AGCCAGTAACCAGAAAATTGAGC	CCACTGCTGCAACACATTCATA
	Acrv1	TCAGCAACTTTCAAGCGAGTAT	CTCCTGAAGAGTGCTCACCTG
Luciferase reporter assay	Hist1h2ba_pro	ACTAGTGAGGAGTAATGCGCGTCTTC	AAGCTTAAGCTGTTCTGATGGCAAGC
	Sycp1_pro	ACTAGTCTCCCGTTTTGCTTGCTTAG	AAGCTTTGCGTTCTAGGGATGGAACT
	Taf7l_pro	ACTAGTTGACACGCTGCAATAAGGTC	AAGCTTGTCCCGGTCTCCTTCACC
